# Supplementary material for: The single-cell transcriptional landscape of mammalian organogenesis
Source: Springer Nature journal article supplement (doi:10.1038/s41586-019-0969-x), 2019-02-20
Supplement: MOESM3 [file 41586_2019_969_MOESM3_ESM.xlsx]

## Sheet: Table S11
Supplementary Table 11: RT, ligation and PCR primer sequences for sci-RNA-seq3.
RT primer sequences
Name	Sequence
sc_ligation_RT_1	/5Phos/CAGAGCNNNNNNNNTCCTACCAGTTTTTTTTTTTTTTTTTTTTTTTTTTTTTTT
sc_ligation_RT_2	/5Phos/CAGAGCNNNNNNNNGCGTTGGAGCTTTTTTTTTTTTTTTTTTTTTTTTTTTTTT
sc_ligation_RT_3	/5Phos/CAGAGCNNNNNNNNGATCTTACGCTTTTTTTTTTTTTTTTTTTTTTTTTTTTTT
sc_ligation_RT_4	/5Phos/CAGAGCNNNNNNNNCTGATGGTCATTTTTTTTTTTTTTTTTTTTTTTTTTTTTT
sc_ligation_RT_5	/5Phos/CAGAGCNNNNNNNNCCGAGAATCCTTTTTTTTTTTTTTTTTTTTTTTTTTTTTT
sc_ligation_RT_6	/5Phos/CAGAGCNNNNNNNNGCCGCAACGATTTTTTTTTTTTTTTTTTTTTTTTTTTTTT
sc_ligation_RT_7	/5Phos/CAGAGCNNNNNNNNTGAGTCTGGCTTTTTTTTTTTTTTTTTTTTTTTTTTTTTT
sc_ligation_RT_8	/5Phos/CAGAGCNNNNNNNNTGCGGACCTATTTTTTTTTTTTTTTTTTTTTTTTTTTTTT
sc_ligation_RT_9	/5Phos/CAGAGCNNNNNNNNACGGAGGCGGTTTTTTTTTTTTTTTTTTTTTTTTTTTTTT
sc_ligation_RT_10	/5Phos/CAGAGCNNNNNNNNTAGATCTACTTTTTTTTTTTTTTTTTTTTTTTTTTTTTTT
sc_ligation_RT_11	/5Phos/CAGAGCNNNNNNNNAATTAAGACTTTTTTTTTTTTTTTTTTTTTTTTTTTTTTT
sc_ligation_RT_12	/5Phos/CAGAGCNNNNNNNNTTATTCATTCTTTTTTTTTTTTTTTTTTTTTTTTTTTTTT
sc_ligation_RT_13	/5Phos/CAGAGCNNNNNNNNTTGACTTCAGTTTTTTTTTTTTTTTTTTTTTTTTTTTTTT
sc_ligation_RT_14	/5Phos/CAGAGCNNNNNNNNAGAGCTATAATTTTTTTTTTTTTTTTTTTTTTTTTTTTTT
sc_ligation_RT_15	/5Phos/CAGAGCNNNNNNNNCTAAGAGAAGTTTTTTTTTTTTTTTTTTTTTTTTTTTTTT
sc_ligation_RT_16	/5Phos/CAGAGCNNNNNNNNACTCAATAGGTTTTTTTTTTTTTTTTTTTTTTTTTTTTTT
sc_ligation_RT_17	/5Phos/CAGAGCNNNNNNNNCTTGCGCCGCTTTTTTTTTTTTTTTTTTTTTTTTTTTTTT
sc_ligation_RT_18	/5Phos/CAGAGCNNNNNNNNGGTACTGCCTTTTTTTTTTTTTTTTTTTTTTTTTTTTTTT
sc_ligation_RT_19	/5Phos/CAGAGCNNNNNNNNTAGAATTAACTTTTTTTTTTTTTTTTTTTTTTTTTTTTTT
sc_ligation_RT_20	/5Phos/CAGAGCNNNNNNNNGCCATTCTCCTTTTTTTTTTTTTTTTTTTTTTTTTTTTTT
sc_ligation_RT_21	/5Phos/CAGAGCNNNNNNNNTGCCGGCAGATTTTTTTTTTTTTTTTTTTTTTTTTTTTTT
sc_ligation_RT_22	/5Phos/CAGAGCNNNNNNNNTTACCGAGGCTTTTTTTTTTTTTTTTTTTTTTTTTTTTTT
sc_ligation_RT_23	/5Phos/CAGAGCNNNNNNNNATCATATTAGTTTTTTTTTTTTTTTTTTTTTTTTTTTTTT
sc_ligation_RT_24	/5Phos/CAGAGCNNNNNNNNTGGTCAGCCATTTTTTTTTTTTTTTTTTTTTTTTTTTTTT
sc_ligation_RT_25	/5Phos/CAGAGCNNNNNNNNACTATGCAATTTTTTTTTTTTTTTTTTTTTTTTTTTTTTT
sc_ligation_RT_26	/5Phos/CAGAGCNNNNNNNNCGACGCGACTTTTTTTTTTTTTTTTTTTTTTTTTTTTTTT
sc_ligation_RT_27	/5Phos/CAGAGCNNNNNNNNGATACGGAACTTTTTTTTTTTTTTTTTTTTTTTTTTTTTT
sc_ligation_RT_28	/5Phos/CAGAGCNNNNNNNNTTATCCGGATTTTTTTTTTTTTTTTTTTTTTTTTTTTTTT
sc_ligation_RT_29	/5Phos/CAGAGCNNNNNNNNTAGAGTAATATTTTTTTTTTTTTTTTTTTTTTTTTTTTTT
sc_ligation_RT_30	/5Phos/CAGAGCNNNNNNNNGCAGGTCCGTTTTTTTTTTTTTTTTTTTTTTTTTTTTTTT
sc_ligation_RT_31	/5Phos/CAGAGCNNNNNNNNTCGGCCTTACTTTTTTTTTTTTTTTTTTTTTTTTTTTTTT
sc_ligation_RT_32	/5Phos/CAGAGCNNNNNNNNAGAACGTCTCTTTTTTTTTTTTTTTTTTTTTTTTTTTTTT
sc_ligation_RT_33	/5Phos/CAGAGCNNNNNNNNCCAGTTCCAATTTTTTTTTTTTTTTTTTTTTTTTTTTTTT
sc_ligation_RT_34	/5Phos/CAGAGCNNNNNNNNACTTAACCTTTTTTTTTTTTTTTTTTTTTTTTTTTTTTTT
sc_ligation_RT_35	/5Phos/CAGAGCNNNNNNNNCAACCGCTAATTTTTTTTTTTTTTTTTTTTTTTTTTTTTT
sc_ligation_RT_36	/5Phos/CAGAGCNNNNNNNNGACCTTGATATTTTTTTTTTTTTTTTTTTTTTTTTTTTTT
sc_ligation_RT_37	/5Phos/CAGAGCNNNNNNNNTCTGATACCATTTTTTTTTTTTTTTTTTTTTTTTTTTTTT
sc_ligation_RT_38	/5Phos/CAGAGCNNNNNNNNGAAGATCGAGTTTTTTTTTTTTTTTTTTTTTTTTTTTTTT
sc_ligation_RT_39	/5Phos/CAGAGCNNNNNNNNAAGAAGCTAGTTTTTTTTTTTTTTTTTTTTTTTTTTTTTT
sc_ligation_RT_40	/5Phos/CAGAGCNNNNNNNNTCCGGCCTCGTTTTTTTTTTTTTTTTTTTTTTTTTTTTTT
sc_ligation_RT_41	/5Phos/CAGAGCNNNNNNNNAGAGAAGGTTTTTTTTTTTTTTTTTTTTTTTTTTTTTTTT
sc_ligation_RT_42	/5Phos/CAGAGCNNNNNNNNCATACTCCGATTTTTTTTTTTTTTTTTTTTTTTTTTTTTT
sc_ligation_RT_43	/5Phos/CAGAGCNNNNNNNNGCTAACTTGCTTTTTTTTTTTTTTTTTTTTTTTTTTTTTT
sc_ligation_RT_44	/5Phos/CAGAGCNNNNNNNNGGCTGAGCTCTTTTTTTTTTTTTTTTTTTTTTTTTTTTTT
sc_ligation_RT_45	/5Phos/CAGAGCNNNNNNNNCCGATTCCTGTTTTTTTTTTTTTTTTTTTTTTTTTTTTTT
sc_ligation_RT_46	/5Phos/CAGAGCNNNNNNNNACCGCCAACCTTTTTTTTTTTTTTTTTTTTTTTTTTTTTT
sc_ligation_RT_47	/5Phos/CAGAGCNNNNNNNNATAAGGAGCATTTTTTTTTTTTTTTTTTTTTTTTTTTTTT
sc_ligation_RT_48	/5Phos/CAGAGCNNNNNNNNCGAACGCCGGTTTTTTTTTTTTTTTTTTTTTTTTTTTTTT
sc_ligation_RT_49	/5Phos/CAGAGCNNNNNNNNGGTATGCTTGTTTTTTTTTTTTTTTTTTTTTTTTTTTTTT
sc_ligation_RT_50	/5Phos/CAGAGCNNNNNNNNAACCTGCGTATTTTTTTTTTTTTTTTTTTTTTTTTTTTTT
sc_ligation_RT_51	/5Phos/CAGAGCNNNNNNNNGGCAGACGCCTTTTTTTTTTTTTTTTTTTTTTTTTTTTTT
sc_ligation_RT_52	/5Phos/CAGAGCNNNNNNNNTAGCCGTCATTTTTTTTTTTTTTTTTTTTTTTTTTTTTTT
sc_ligation_RT_53	/5Phos/CAGAGCNNNNNNNNCTAGTAGTCTTTTTTTTTTTTTTTTTTTTTTTTTTTTTTT
sc_ligation_RT_54	/5Phos/CAGAGCNNNNNNNNACGCGAGATTTTTTTTTTTTTTTTTTTTTTTTTTTTTTTT
sc_ligation_RT_55	/5Phos/CAGAGCNNNNNNNNGGTATCCGCCTTTTTTTTTTTTTTTTTTTTTTTTTTTTTT
sc_ligation_RT_56	/5Phos/CAGAGCNNNNNNNNAACTAGGCGCTTTTTTTTTTTTTTTTTTTTTTTTTTTTTT
sc_ligation_RT_57	/5Phos/CAGAGCNNNNNNNNTCGCTAAGCATTTTTTTTTTTTTTTTTTTTTTTTTTTTTT
sc_ligation_RT_58	/5Phos/CAGAGCNNNNNNNNTATATACTAATTTTTTTTTTTTTTTTTTTTTTTTTTTTTT
sc_ligation_RT_59	/5Phos/CAGAGCNNNNNNNNACTTGCTAGATTTTTTTTTTTTTTTTTTTTTTTTTTTTTT
sc_ligation_RT_60	/5Phos/CAGAGCNNNNNNNNAACCATTGGATTTTTTTTTTTTTTTTTTTTTTTTTTTTTT
sc_ligation_RT_61	/5Phos/CAGAGCNNNNNNNNTCGCGGTTGGTTTTTTTTTTTTTTTTTTTTTTTTTTTTTT
sc_ligation_RT_62	/5Phos/CAGAGCNNNNNNNNCGTAGTTACCTTTTTTTTTTTTTTTTTTTTTTTTTTTTTT
sc_ligation_RT_63	/5Phos/CAGAGCNNNNNNNNTCCAATCATCTTTTTTTTTTTTTTTTTTTTTTTTTTTTTT
sc_ligation_RT_64	/5Phos/CAGAGCNNNNNNNNAATCGATAATTTTTTTTTTTTTTTTTTTTTTTTTTTTTTT
sc_ligation_RT_65	/5Phos/CAGAGCNNNNNNNNCCATTATCTATTTTTTTTTTTTTTTTTTTTTTTTTTTTTT
sc_ligation_RT_66	/5Phos/CAGAGCNNNNNNNNTCAACGTAAGTTTTTTTTTTTTTTTTTTTTTTTTTTTTTT
sc_ligation_RT_67	/5Phos/CAGAGCNNNNNNNNTCTAATAGTATTTTTTTTTTTTTTTTTTTTTTTTTTTTTT
sc_ligation_RT_68	/5Phos/CAGAGCNNNNNNNNGATCGCTTCTTTTTTTTTTTTTTTTTTTTTTTTTTTTTTT
sc_ligation_RT_69	/5Phos/CAGAGCNNNNNNNNCTAACTAGATTTTTTTTTTTTTTTTTTTTTTTTTTTTTTT
sc_ligation_RT_70	/5Phos/CAGAGCNNNNNNNNGCTGGAACTTTTTTTTTTTTTTTTTTTTTTTTTTTTTTTT
sc_ligation_RT_71	/5Phos/CAGAGCNNNNNNNNAGGTTAGTTCTTTTTTTTTTTTTTTTTTTTTTTTTTTTTT
sc_ligation_RT_72	/5Phos/CAGAGCNNNNNNNNCATTCGACGGTTTTTTTTTTTTTTTTTTTTTTTTTTTTTT
sc_ligation_RT_73	/5Phos/CAGAGCNNNNNNNNCATTCAATCATTTTTTTTTTTTTTTTTTTTTTTTTTTTTT
sc_ligation_RT_74	/5Phos/CAGAGCNNNNNNNNCGGATTAGAATTTTTTTTTTTTTTTTTTTTTTTTTTTTTT
sc_ligation_RT_75	/5Phos/CAGAGCNNNNNNNNATCGGCTATCTTTTTTTTTTTTTTTTTTTTTTTTTTTTTT
sc_ligation_RT_76	/5Phos/CAGAGCNNNNNNNNACGAAGTCAATTTTTTTTTTTTTTTTTTTTTTTTTTTTTT
sc_ligation_RT_77	/5Phos/CAGAGCNNNNNNNNTTACCTCGACTTTTTTTTTTTTTTTTTTTTTTTTTTTTTT
sc_ligation_RT_78	/5Phos/CAGAGCNNNNNNNNGGAGGATAGCTTTTTTTTTTTTTTTTTTTTTTTTTTTTTT
sc_ligation_RT_79	/5Phos/CAGAGCNNNNNNNNGGCTCTCTATTTTTTTTTTTTTTTTTTTTTTTTTTTTTTT
sc_ligation_RT_80	/5Phos/CAGAGCNNNNNNNNCGGTCAAGAATTTTTTTTTTTTTTTTTTTTTTTTTTTTTT
sc_ligation_RT_81	/5Phos/CAGAGCNNNNNNNNCGCTCCTAACTTTTTTTTTTTTTTTTTTTTTTTTTTTTTT
sc_ligation_RT_82	/5Phos/CAGAGCNNNNNNNNATCCATGACTTTTTTTTTTTTTTTTTTTTTTTTTTTTTTT
sc_ligation_RT_83	/5Phos/CAGAGCNNNNNNNNAACCTGGTCTTTTTTTTTTTTTTTTTTTTTTTTTTTTTTT
sc_ligation_RT_84	/5Phos/CAGAGCNNNNNNNNGGTACCGGCATTTTTTTTTTTTTTTTTTTTTTTTTTTTTT
sc_ligation_RT_85	/5Phos/CAGAGCNNNNNNNNAAGCCAGTTATTTTTTTTTTTTTTTTTTTTTTTTTTTTTT
sc_ligation_RT_86	/5Phos/CAGAGCNNNNNNNNTCTTGCCGACTTTTTTTTTTTTTTTTTTTTTTTTTTTTTT
sc_ligation_RT_87	/5Phos/CAGAGCNNNNNNNNAAGACCGTTGTTTTTTTTTTTTTTTTTTTTTTTTTTTTTT
sc_ligation_RT_88	/5Phos/CAGAGCNNNNNNNNAGGTTAGCATTTTTTTTTTTTTTTTTTTTTTTTTTTTTTT
sc_ligation_RT_89	/5Phos/CAGAGCNNNNNNNNTTCGCCTCCATTTTTTTTTTTTTTTTTTTTTTTTTTTTTT
sc_ligation_RT_90	/5Phos/CAGAGCNNNNNNNNAGAGCCAAGGTTTTTTTTTTTTTTTTTTTTTTTTTTTTTT
sc_ligation_RT_91	/5Phos/CAGAGCNNNNNNNNAATACCATCCTTTTTTTTTTTTTTTTTTTTTTTTTTTTTT
sc_ligation_RT_92	/5Phos/CAGAGCNNNNNNNNAGCTCTCCTCTTTTTTTTTTTTTTTTTTTTTTTTTTTTTT
sc_ligation_RT_93	/5Phos/CAGAGCNNNNNNNNAGCTTATCCGTTTTTTTTTTTTTTTTTTTTTTTTTTTTTT
sc_ligation_RT_94	/5Phos/CAGAGCNNNNNNNNCATCTCTGCATTTTTTTTTTTTTTTTTTTTTTTTTTTTTT
sc_ligation_RT_95	/5Phos/CAGAGCNNNNNNNNACCTGGCCAATTTTTTTTTTTTTTTTTTTTTTTTTTTTTT
sc_ligation_RT_96	/5Phos/CAGAGCNNNNNNNNTAACTGGTTATTTTTTTTTTTTTTTTTTTTTTTTTTTTTT
sc_ligation_RT_97	/5Phos/CAGAGCNNNNNNNNTTGCTAACGGTTTTTTTTTTTTTTTTTTTTTTTTTTTTTT
sc_ligation_RT_98	/5Phos/CAGAGCNNNNNNNNACTAGAGAGTTTTTTTTTTTTTTTTTTTTTTTTTTTTTTT
sc_ligation_RT_99	/5Phos/CAGAGCNNNNNNNNAATGCCGCTTTTTTTTTTTTTTTTTTTTTTTTTTTTTTTT
sc_ligation_RT_100	/5Phos/CAGAGCNNNNNNNNTATAGACGCATTTTTTTTTTTTTTTTTTTTTTTTTTTTTT
sc_ligation_RT_101	/5Phos/CAGAGCNNNNNNNNTCAATCGCATTTTTTTTTTTTTTTTTTTTTTTTTTTTTTT
sc_ligation_RT_102	/5Phos/CAGAGCNNNNNNNNTTCTTAATAATTTTTTTTTTTTTTTTTTTTTTTTTTTTTT
sc_ligation_RT_103	/5Phos/CAGAGCNNNNNNNNGTCCTAGAGGTTTTTTTTTTTTTTTTTTTTTTTTTTTTTT
sc_ligation_RT_104	/5Phos/CAGAGCNNNNNNNNATATTGATACTTTTTTTTTTTTTTTTTTTTTTTTTTTTTT
sc_ligation_RT_105	/5Phos/CAGAGCNNNNNNNNCCGCTGCCAGTTTTTTTTTTTTTTTTTTTTTTTTTTTTTT
sc_ligation_RT_106	/5Phos/CAGAGCNNNNNNNNCAATTACCGTTTTTTTTTTTTTTTTTTTTTTTTTTTTTTT
sc_ligation_RT_107	/5Phos/CAGAGCNNNNNNNNGGCCGTAGTCTTTTTTTTTTTTTTTTTTTTTTTTTTTTTT
sc_ligation_RT_108	/5Phos/CAGAGCNNNNNNNNTAATGAACGATTTTTTTTTTTTTTTTTTTTTTTTTTTTTT
sc_ligation_RT_109	/5Phos/CAGAGCNNNNNNNNCCGTTCCTTATTTTTTTTTTTTTTTTTTTTTTTTTTTTTT
sc_ligation_RT_110	/5Phos/CAGAGCNNNNNNNNATGGCTCTGCTTTTTTTTTTTTTTTTTTTTTTTTTTTTTT
sc_ligation_RT_111	/5Phos/CAGAGCNNNNNNNNGTATAATACGTTTTTTTTTTTTTTTTTTTTTTTTTTTTTT
sc_ligation_RT_112	/5Phos/CAGAGCNNNNNNNNGGCGAACTCGTTTTTTTTTTTTTTTTTTTTTTTTTTTTTT
sc_ligation_RT_113	/5Phos/CAGAGCNNNNNNNNTTAATTGAATTTTTTTTTTTTTTTTTTTTTTTTTTTTTTT
sc_ligation_RT_114	/5Phos/CAGAGCNNNNNNNNTTAGGACCGGTTTTTTTTTTTTTTTTTTTTTTTTTTTTTT
sc_ligation_RT_115	/5Phos/CAGAGCNNNNNNNNAAGTAAGAGCTTTTTTTTTTTTTTTTTTTTTTTTTTTTTT
sc_ligation_RT_116	/5Phos/CAGAGCNNNNNNNNCCTTGGTCCATTTTTTTTTTTTTTTTTTTTTTTTTTTTTT
sc_ligation_RT_117	/5Phos/CAGAGCNNNNNNNNCATCAGAATGTTTTTTTTTTTTTTTTTTTTTTTTTTTTTT
sc_ligation_RT_118	/5Phos/CAGAGCNNNNNNNNTTATAGCAGATTTTTTTTTTTTTTTTTTTTTTTTTTTTTT
sc_ligation_RT_119	/5Phos/CAGAGCNNNNNNNNTTACTTGGAATTTTTTTTTTTTTTTTTTTTTTTTTTTTTT
sc_ligation_RT_120	/5Phos/CAGAGCNNNNNNNNGCTCAGCCGGTTTTTTTTTTTTTTTTTTTTTTTTTTTTTT
sc_ligation_RT_121	/5Phos/CAGAGCNNNNNNNNACGTCCGCAGTTTTTTTTTTTTTTTTTTTTTTTTTTTTTT
sc_ligation_RT_122	/5Phos/CAGAGCNNNNNNNNTTGCGAGGCATTTTTTTTTTTTTTTTTTTTTTTTTTTTTT
sc_ligation_RT_123	/5Phos/CAGAGCNNNNNNNNTTCCAACCGCTTTTTTTTTTTTTTTTTTTTTTTTTTTTTT
sc_ligation_RT_124	/5Phos/CAGAGCNNNNNNNNTCAAGCCGATTTTTTTTTTTTTTTTTTTTTTTTTTTTTTT
sc_ligation_RT_125	/5Phos/CAGAGCNNNNNNNNCTTGCAACCTTTTTTTTTTTTTTTTTTTTTTTTTTTTTTT
sc_ligation_RT_126	/5Phos/CAGAGCNNNNNNNNCCATCGCGAATTTTTTTTTTTTTTTTTTTTTTTTTTTTTT
sc_ligation_RT_127	/5Phos/CAGAGCNNNNNNNNTAGACTTCTTTTTTTTTTTTTTTTTTTTTTTTTTTTTTTT
sc_ligation_RT_128	/5Phos/CAGAGCNNNNNNNNGTCCTTAAGATTTTTTTTTTTTTTTTTTTTTTTTTTTTTT
sc_ligation_RT_129	/5Phos/CAGAGCNNNNNNNNAGTAACGGTCTTTTTTTTTTTTTTTTTTTTTTTTTTTTTT
sc_ligation_RT_130	/5Phos/CAGAGCNNNNNNNNGTTCGTCAGATTTTTTTTTTTTTTTTTTTTTTTTTTTTTT
sc_ligation_RT_131	/5Phos/CAGAGCNNNNNNNNCGCCTAATGCTTTTTTTTTTTTTTTTTTTTTTTTTTTTTT
sc_ligation_RT_132	/5Phos/CAGAGCNNNNNNNNACCGGAATTATTTTTTTTTTTTTTTTTTTTTTTTTTTTTT
sc_ligation_RT_133	/5Phos/CAGAGCNNNNNNNNTAGGCCATAGTTTTTTTTTTTTTTTTTTTTTTTTTTTTTT
sc_ligation_RT_134	/5Phos/CAGAGCNNNNNNNNTAACTCTTAGTTTTTTTTTTTTTTTTTTTTTTTTTTTTTT
sc_ligation_RT_135	/5Phos/CAGAGCNNNNNNNNTATGAGTTAATTTTTTTTTTTTTTTTTTTTTTTTTTTTTT
sc_ligation_RT_136	/5Phos/CAGAGCNNNNNNNNTATCATGATCTTTTTTTTTTTTTTTTTTTTTTTTTTTTTT
sc_ligation_RT_137	/5Phos/CAGAGCNNNNNNNNGAGCATATGGTTTTTTTTTTTTTTTTTTTTTTTTTTTTTT
sc_ligation_RT_138	/5Phos/CAGAGCNNNNNNNNTAACGATCCATTTTTTTTTTTTTTTTTTTTTTTTTTTTTT
sc_ligation_RT_139	/5Phos/CAGAGCNNNNNNNNCGGCGTAACTTTTTTTTTTTTTTTTTTTTTTTTTTTTTTT
sc_ligation_RT_140	/5Phos/CAGAGCNNNNNNNNCGTCGCAGCCTTTTTTTTTTTTTTTTTTTTTTTTTTTTTT
sc_ligation_RT_141	/5Phos/CAGAGCNNNNNNNNGTAGCTCCATTTTTTTTTTTTTTTTTTTTTTTTTTTTTTT
sc_ligation_RT_142	/5Phos/CAGAGCNNNNNNNNGTCCTACTTGTTTTTTTTTTTTTTTTTTTTTTTTTTTTTT
sc_ligation_RT_143	/5Phos/CAGAGCNNNNNNNNGGTAGGTTAGTTTTTTTTTTTTTTTTTTTTTTTTTTTTTT
sc_ligation_RT_144	/5Phos/CAGAGCNNNNNNNNGAGCATCATTTTTTTTTTTTTTTTTTTTTTTTTTTTTTTT
sc_ligation_RT_145	/5Phos/CAGAGCNNNNNNNNCCGCTCCGGCTTTTTTTTTTTTTTTTTTTTTTTTTTTTTT
sc_ligation_RT_146	/5Phos/CAGAGCNNNNNNNNTTCTTCCGGTTTTTTTTTTTTTTTTTTTTTTTTTTTTTTT
sc_ligation_RT_147	/5Phos/CAGAGCNNNNNNNNAGGAGAGAACTTTTTTTTTTTTTTTTTTTTTTTTTTTTTT
sc_ligation_RT_148	/5Phos/CAGAGCNNNNNNNNTAACTCAATTTTTTTTTTTTTTTTTTTTTTTTTTTTTTTT
sc_ligation_RT_149	/5Phos/CAGAGCNNNNNNNNACTATAGGTTTTTTTTTTTTTTTTTTTTTTTTTTTTTTTT
sc_ligation_RT_150	/5Phos/CAGAGCNNNNNNNNAGGTATACTCTTTTTTTTTTTTTTTTTTTTTTTTTTTTTT
sc_ligation_RT_151	/5Phos/CAGAGCNNNNNNNNTTCATAGGACTTTTTTTTTTTTTTTTTTTTTTTTTTTTTT
sc_ligation_RT_152	/5Phos/CAGAGCNNNNNNNNGGAGGCCTCCTTTTTTTTTTTTTTTTTTTTTTTTTTTTTT
sc_ligation_RT_153	/5Phos/CAGAGCNNNNNNNNTTCAATATAATTTTTTTTTTTTTTTTTTTTTTTTTTTTTT
sc_ligation_RT_154	/5Phos/CAGAGCNNNNNNNNACGTCATATATTTTTTTTTTTTTTTTTTTTTTTTTTTTTT
sc_ligation_RT_155	/5Phos/CAGAGCNNNNNNNNCGGTTGCGCGTTTTTTTTTTTTTTTTTTTTTTTTTTTTTT
sc_ligation_RT_156	/5Phos/CAGAGCNNNNNNNNCAAGGAGGTCTTTTTTTTTTTTTTTTTTTTTTTTTTTTTT
sc_ligation_RT_157	/5Phos/CAGAGCNNNNNNNNTTACGATGAATTTTTTTTTTTTTTTTTTTTTTTTTTTTTT
sc_ligation_RT_158	/5Phos/CAGAGCNNNNNNNNTTGCTGGCATTTTTTTTTTTTTTTTTTTTTTTTTTTTTTT
sc_ligation_RT_159	/5Phos/CAGAGCNNNNNNNNATTCGACCAATTTTTTTTTTTTTTTTTTTTTTTTTTTTTT
sc_ligation_RT_160	/5Phos/CAGAGCNNNNNNNNCCGCGGCTCATTTTTTTTTTTTTTTTTTTTTTTTTTTTTT
sc_ligation_RT_161	/5Phos/CAGAGCNNNNNNNNGTTACGCAAGTTTTTTTTTTTTTTTTTTTTTTTTTTTTTT
sc_ligation_RT_162	/5Phos/CAGAGCNNNNNNNNAGCCGGTACCTTTTTTTTTTTTTTTTTTTTTTTTTTTTTT
sc_ligation_RT_163	/5Phos/CAGAGCNNNNNNNNACCTCTATCTTTTTTTTTTTTTTTTTTTTTTTTTTTTTTT
sc_ligation_RT_164	/5Phos/CAGAGCNNNNNNNNGGACTACTACTTTTTTTTTTTTTTTTTTTTTTTTTTTTTT
sc_ligation_RT_165	/5Phos/CAGAGCNNNNNNNNGTATCATCGATTTTTTTTTTTTTTTTTTTTTTTTTTTTTT
sc_ligation_RT_166	/5Phos/CAGAGCNNNNNNNNCCGCGATTATTTTTTTTTTTTTTTTTTTTTTTTTTTTTTT
sc_ligation_RT_167	/5Phos/CAGAGCNNNNNNNNATTCAGGTACTTTTTTTTTTTTTTTTTTTTTTTTTTTTTT
sc_ligation_RT_168	/5Phos/CAGAGCNNNNNNNNATGGAATTGGTTTTTTTTTTTTTTTTTTTTTTTTTTTTTT
sc_ligation_RT_169	/5Phos/CAGAGCNNNNNNNNGACGAAGCGTTTTTTTTTTTTTTTTTTTTTTTTTTTTTTT
sc_ligation_RT_170	/5Phos/CAGAGCNNNNNNNNCTTGCAGTAGTTTTTTTTTTTTTTTTTTTTTTTTTTTTTT
sc_ligation_RT_171	/5Phos/CAGAGCNNNNNNNNCTTGGTAATGTTTTTTTTTTTTTTTTTTTTTTTTTTTTTT
sc_ligation_RT_172	/5Phos/CAGAGCNNNNNNNNCAAGTCGACCTTTTTTTTTTTTTTTTTTTTTTTTTTTTTT
sc_ligation_RT_173	/5Phos/CAGAGCNNNNNNNNTAACGAATTGTTTTTTTTTTTTTTTTTTTTTTTTTTTTTT
sc_ligation_RT_174	/5Phos/CAGAGCNNNNNNNNTTATTCTGAGTTTTTTTTTTTTTTTTTTTTTTTTTTTTTT
sc_ligation_RT_175	/5Phos/CAGAGCNNNNNNNNTTATTATGGTTTTTTTTTTTTTTTTTTTTTTTTTTTTTTT
sc_ligation_RT_176	/5Phos/CAGAGCNNNNNNNNATATGAGCCATTTTTTTTTTTTTTTTTTTTTTTTTTTTTT
sc_ligation_RT_177	/5Phos/CAGAGCNNNNNNNNCAACCAGTACTTTTTTTTTTTTTTTTTTTTTTTTTTTTTT
sc_ligation_RT_178	/5Phos/CAGAGCNNNNNNNNCATCCGACTATTTTTTTTTTTTTTTTTTTTTTTTTTTTTT
sc_ligation_RT_179	/5Phos/CAGAGCNNNNNNNNCCGCAAGTTCTTTTTTTTTTTTTTTTTTTTTTTTTTTTTT
sc_ligation_RT_180	/5Phos/CAGAGCNNNNNNNNCAGGAGGAGATTTTTTTTTTTTTTTTTTTTTTTTTTTTTT
sc_ligation_RT_181	/5Phos/CAGAGCNNNNNNNNGATATCGGCGTTTTTTTTTTTTTTTTTTTTTTTTTTTTTT
sc_ligation_RT_182	/5Phos/CAGAGCNNNNNNNNCCAGTCCTCTTTTTTTTTTTTTTTTTTTTTTTTTTTTTTT
sc_ligation_RT_183	/5Phos/CAGAGCNNNNNNNNCATAGTTCGGTTTTTTTTTTTTTTTTTTTTTTTTTTTTTT
sc_ligation_RT_184	/5Phos/CAGAGCNNNNNNNNCGTAATGCAGTTTTTTTTTTTTTTTTTTTTTTTTTTTTTT
sc_ligation_RT_185	/5Phos/CAGAGCNNNNNNNNCCGTTCGGATTTTTTTTTTTTTTTTTTTTTTTTTTTTTTT
sc_ligation_RT_186	/5Phos/CAGAGCNNNNNNNNCCATAAGTCCTTTTTTTTTTTTTTTTTTTTTTTTTTTTTT
sc_ligation_RT_187	/5Phos/CAGAGCNNNNNNNNGGCAATGAGATTTTTTTTTTTTTTTTTTTTTTTTTTTTTT
sc_ligation_RT_188	/5Phos/CAGAGCNNNNNNNNCGGTTATGCCTTTTTTTTTTTTTTTTTTTTTTTTTTTTTT
sc_ligation_RT_189	/5Phos/CAGAGCNNNNNNNNTGGCCGGCCTTTTTTTTTTTTTTTTTTTTTTTTTTTTTTT
sc_ligation_RT_190	/5Phos/CAGAGCNNNNNNNNAGCTGCAATATTTTTTTTTTTTTTTTTTTTTTTTTTTTTT
sc_ligation_RT_191	/5Phos/CAGAGCNNNNNNNNTGGCCATGCATTTTTTTTTTTTTTTTTTTTTTTTTTTTTT
sc_ligation_RT_192	/5Phos/CAGAGCNNNNNNNNTGACGCTCCGTTTTTTTTTTTTTTTTTTTTTTTTTTTTTT
sc_ligation_RT_193	/5Phos/CAGAGCNNNNNNNNAACTGCTGCCTTTTTTTTTTTTTTTTTTTTTTTTTTTTTT
sc_ligation_RT_194	/5Phos/CAGAGCNNNNNNNNTGCGCGATGCTTTTTTTTTTTTTTTTTTTTTTTTTTTTTT
sc_ligation_RT_195	/5Phos/CAGAGCNNNNNNNNATTGAGATTGTTTTTTTTTTTTTTTTTTTTTTTTTTTTTT
sc_ligation_RT_196	/5Phos/CAGAGCNNNNNNNNTTGATATATTTTTTTTTTTTTTTTTTTTTTTTTTTTTTTT
sc_ligation_RT_197	/5Phos/CAGAGCNNNNNNNNCGGTAGGAATTTTTTTTTTTTTTTTTTTTTTTTTTTTTTT
sc_ligation_RT_198	/5Phos/CAGAGCNNNNNNNNACCAGCGCAGTTTTTTTTTTTTTTTTTTTTTTTTTTTTTT
sc_ligation_RT_199	/5Phos/CAGAGCNNNNNNNNAGTTCGAGTATTTTTTTTTTTTTTTTTTTTTTTTTTTTTT
sc_ligation_RT_200	/5Phos/CAGAGCNNNNNNNNTTGGACGCTGTTTTTTTTTTTTTTTTTTTTTTTTTTTTTT
sc_ligation_RT_201	/5Phos/CAGAGCNNNNNNNNATAGACTAGGTTTTTTTTTTTTTTTTTTTTTTTTTTTTTT
sc_ligation_RT_202	/5Phos/CAGAGCNNNNNNNNTATAGTAAGCTTTTTTTTTTTTTTTTTTTTTTTTTTTTTT
sc_ligation_RT_203	/5Phos/CAGAGCNNNNNNNNCGGTCGTTAATTTTTTTTTTTTTTTTTTTTTTTTTTTTTT
sc_ligation_RT_204	/5Phos/CAGAGCNNNNNNNNATGGCGGATCTTTTTTTTTTTTTTTTTTTTTTTTTTTTTT
sc_ligation_RT_205	/5Phos/CAGAGCNNNNNNNNCTCTGATCAGTTTTTTTTTTTTTTTTTTTTTTTTTTTTTT
sc_ligation_RT_206	/5Phos/CAGAGCNNNNNNNNGGCCAGTCCGTTTTTTTTTTTTTTTTTTTTTTTTTTTTTT
sc_ligation_RT_207	/5Phos/CAGAGCNNNNNNNNCGGAAGATATTTTTTTTTTTTTTTTTTTTTTTTTTTTTTT
sc_ligation_RT_208	/5Phos/CAGAGCNNNNNNNNTGGCTGATGATTTTTTTTTTTTTTTTTTTTTTTTTTTTTT
sc_ligation_RT_209	/5Phos/CAGAGCNNNNNNNNGAAGGTTGCCTTTTTTTTTTTTTTTTTTTTTTTTTTTTTT
sc_ligation_RT_210	/5Phos/CAGAGCNNNNNNNNGTTGAAGGATTTTTTTTTTTTTTTTTTTTTTTTTTTTTTT
sc_ligation_RT_211	/5Phos/CAGAGCNNNNNNNNTGCGCCAGAATTTTTTTTTTTTTTTTTTTTTTTTTTTTTT
sc_ligation_RT_212	/5Phos/CAGAGCNNNNNNNNCGAATAATTCTTTTTTTTTTTTTTTTTTTTTTTTTTTTTT
sc_ligation_RT_213	/5Phos/CAGAGCNNNNNNNNGCGACGCCTTTTTTTTTTTTTTTTTTTTTTTTTTTTTTTT
sc_ligation_RT_214	/5Phos/CAGAGCNNNNNNNNATCAACGATTTTTTTTTTTTTTTTTTTTTTTTTTTTTTTT
sc_ligation_RT_215	/5Phos/CAGAGCNNNNNNNNGTTCTGAATTTTTTTTTTTTTTTTTTTTTTTTTTTTTTTT
sc_ligation_RT_216	/5Phos/CAGAGCNNNNNNNNGCTAACCTCATTTTTTTTTTTTTTTTTTTTTTTTTTTTTT
sc_ligation_RT_217	/5Phos/CAGAGCNNNNNNNNGGAGCGGCCGTTTTTTTTTTTTTTTTTTTTTTTTTTTTTT
sc_ligation_RT_218	/5Phos/CAGAGCNNNNNNNNCGCGTACGACTTTTTTTTTTTTTTTTTTTTTTTTTTTTTT
sc_ligation_RT_219	/5Phos/CAGAGCNNNNNNNNCGATGGCGCCTTTTTTTTTTTTTTTTTTTTTTTTTTTTTT
sc_ligation_RT_220	/5Phos/CAGAGCNNNNNNNNTGGTATTCATTTTTTTTTTTTTTTTTTTTTTTTTTTTTTT
sc_ligation_RT_221	/5Phos/CAGAGCNNNNNNNNGATAAGGCAATTTTTTTTTTTTTTTTTTTTTTTTTTTTTT
sc_ligation_RT_222	/5Phos/CAGAGCNNNNNNNNGCCGGTCGAGTTTTTTTTTTTTTTTTTTTTTTTTTTTTTT
sc_ligation_RT_223	/5Phos/CAGAGCNNNNNNNNTGCGCCATCTTTTTTTTTTTTTTTTTTTTTTTTTTTTTTT
sc_ligation_RT_224	/5Phos/CAGAGCNNNNNNNNAAGTCTTCCGTTTTTTTTTTTTTTTTTTTTTTTTTTTTTT
sc_ligation_RT_225	/5Phos/CAGAGCNNNNNNNNAGACTCAAGCTTTTTTTTTTTTTTTTTTTTTTTTTTTTTT
sc_ligation_RT_226	/5Phos/CAGAGCNNNNNNNNGCAGGCGACGTTTTTTTTTTTTTTTTTTTTTTTTTTTTTT
sc_ligation_RT_227	/5Phos/CAGAGCNNNNNNNNAATACTCTTCTTTTTTTTTTTTTTTTTTTTTTTTTTTTTT
sc_ligation_RT_228	/5Phos/CAGAGCNNNNNNNNCCAACTAACCTTTTTTTTTTTTTTTTTTTTTTTTTTTTTT
sc_ligation_RT_229	/5Phos/CAGAGCNNNNNNNNTATCCTCAATTTTTTTTTTTTTTTTTTTTTTTTTTTTTTT
sc_ligation_RT_230	/5Phos/CAGAGCNNNNNNNNGCCGTCGCGTTTTTTTTTTTTTTTTTTTTTTTTTTTTTTT
sc_ligation_RT_231	/5Phos/CAGAGCNNNNNNNNAATGCTAGTCTTTTTTTTTTTTTTTTTTTTTTTTTTTTTT
sc_ligation_RT_232	/5Phos/CAGAGCNNNNNNNNGACGACCTGCTTTTTTTTTTTTTTTTTTTTTTTTTTTTTT
sc_ligation_RT_233	/5Phos/CAGAGCNNNNNNNNAGAGCCAGCCTTTTTTTTTTTTTTTTTTTTTTTTTTTTTT
sc_ligation_RT_234	/5Phos/CAGAGCNNNNNNNNCCAGGCCGCATTTTTTTTTTTTTTTTTTTTTTTTTTTTTT
sc_ligation_RT_235	/5Phos/CAGAGCNNNNNNNNCAGGTATGGATTTTTTTTTTTTTTTTTTTTTTTTTTTTTT
sc_ligation_RT_236	/5Phos/CAGAGCNNNNNNNNTTAATTATTGTTTTTTTTTTTTTTTTTTTTTTTTTTTTTT
sc_ligation_RT_237	/5Phos/CAGAGCNNNNNNNNCCGTTGACTTTTTTTTTTTTTTTTTTTTTTTTTTTTTTTT
sc_ligation_RT_238	/5Phos/CAGAGCNNNNNNNNGCCAGGATCATTTTTTTTTTTTTTTTTTTTTTTTTTTTTT
sc_ligation_RT_239	/5Phos/CAGAGCNNNNNNNNCTTCGGCGCATTTTTTTTTTTTTTTTTTTTTTTTTTTTTT
sc_ligation_RT_240	/5Phos/CAGAGCNNNNNNNNCAAGGCATTCTTTTTTTTTTTTTTTTTTTTTTTTTTTTTT
sc_ligation_RT_241	/5Phos/CAGAGCNNNNNNNNCGGATGAAGGTTTTTTTTTTTTTTTTTTTTTTTTTTTTTT
sc_ligation_RT_242	/5Phos/CAGAGCNNNNNNNNTATCGTCGGCTTTTTTTTTTTTTTTTTTTTTTTTTTTTTT
sc_ligation_RT_243	/5Phos/CAGAGCNNNNNNNNGCCGTATGCTTTTTTTTTTTTTTTTTTTTTTTTTTTTTTT
sc_ligation_RT_244	/5Phos/CAGAGCNNNNNNNNCTGAACTGGTTTTTTTTTTTTTTTTTTTTTTTTTTTTTTT
sc_ligation_RT_245	/5Phos/CAGAGCNNNNNNNNCATAACCAGCTTTTTTTTTTTTTTTTTTTTTTTTTTTTTT
sc_ligation_RT_246	/5Phos/CAGAGCNNNNNNNNAAGTTGCCATTTTTTTTTTTTTTTTTTTTTTTTTTTTTTT
sc_ligation_RT_247	/5Phos/CAGAGCNNNNNNNNAGGCCGCTCGTTTTTTTTTTTTTTTTTTTTTTTTTTTTTT
sc_ligation_RT_248	/5Phos/CAGAGCNNNNNNNNGTACTAGTAATTTTTTTTTTTTTTTTTTTTTTTTTTTTTT
sc_ligation_RT_249	/5Phos/CAGAGCNNNNNNNNGCGCGGTAGTTTTTTTTTTTTTTTTTTTTTTTTTTTTTTT
sc_ligation_RT_250	/5Phos/CAGAGCNNNNNNNNCTGGATTAGTTTTTTTTTTTTTTTTTTTTTTTTTTTTTTT
sc_ligation_RT_251	/5Phos/CAGAGCNNNNNNNNTTGGATCCTTTTTTTTTTTTTTTTTTTTTTTTTTTTTTTT
sc_ligation_RT_252	/5Phos/CAGAGCNNNNNNNNTTGGAATCTCTTTTTTTTTTTTTTTTTTTTTTTTTTTTTT
sc_ligation_RT_253	/5Phos/CAGAGCNNNNNNNNACCTGGACGCTTTTTTTTTTTTTTTTTTTTTTTTTTTTTT
sc_ligation_RT_254	/5Phos/CAGAGCNNNNNNNNGCGTTCAGCTTTTTTTTTTTTTTTTTTTTTTTTTTTTTTT
sc_ligation_RT_255	/5Phos/CAGAGCNNNNNNNNTTAGCAATAATTTTTTTTTTTTTTTTTTTTTTTTTTTTTT
sc_ligation_RT_256	/5Phos/CAGAGCNNNNNNNNTTGATGCTATTTTTTTTTTTTTTTTTTTTTTTTTTTTTTT
sc_ligation_RT_257	/5Phos/CAGAGCNNNNNNNNCTCTGCGGCATTTTTTTTTTTTTTTTTTTTTTTTTTTTTT
sc_ligation_RT_258	/5Phos/CAGAGCNNNNNNNNAATAATACCATTTTTTTTTTTTTTTTTTTTTTTTTTTTTT
sc_ligation_RT_259	/5Phos/CAGAGCNNNNNNNNACGCCGTTCATTTTTTTTTTTTTTTTTTTTTTTTTTTTTT
sc_ligation_RT_260	/5Phos/CAGAGCNNNNNNNNTTCGCTTACGTTTTTTTTTTTTTTTTTTTTTTTTTTTTTT
sc_ligation_RT_261	/5Phos/CAGAGCNNNNNNNNTACGGCTACGTTTTTTTTTTTTTTTTTTTTTTTTTTTTTT
sc_ligation_RT_262	/5Phos/CAGAGCNNNNNNNNTTCTTATCGATTTTTTTTTTTTTTTTTTTTTTTTTTTTTT
sc_ligation_RT_263	/5Phos/CAGAGCNNNNNNNNTTCCATGGCATTTTTTTTTTTTTTTTTTTTTTTTTTTTTT
sc_ligation_RT_264	/5Phos/CAGAGCNNNNNNNNAAGTAGTCAGTTTTTTTTTTTTTTTTTTTTTTTTTTTTTT
sc_ligation_RT_265	/5Phos/CAGAGCNNNNNNNNTCAGCTCTAATTTTTTTTTTTTTTTTTTTTTTTTTTTTTT
sc_ligation_RT_266	/5Phos/CAGAGCNNNNNNNNCGAATAGATGTTTTTTTTTTTTTTTTTTTTTTTTTTTTTT
sc_ligation_RT_267	/5Phos/CAGAGCNNNNNNNNCGGAGATCCGTTTTTTTTTTTTTTTTTTTTTTTTTTTTTT
sc_ligation_RT_268	/5Phos/CAGAGCNNNNNNNNACCGCAGAATTTTTTTTTTTTTTTTTTTTTTTTTTTTTTT
sc_ligation_RT_269	/5Phos/CAGAGCNNNNNNNNTCTCCTATAATTTTTTTTTTTTTTTTTTTTTTTTTTTTTT
sc_ligation_RT_270	/5Phos/CAGAGCNNNNNNNNAAGACGGCCATTTTTTTTTTTTTTTTTTTTTTTTTTTTTT
sc_ligation_RT_271	/5Phos/CAGAGCNNNNNNNNGCCAACGCCATTTTTTTTTTTTTTTTTTTTTTTTTTTTTT
sc_ligation_RT_272	/5Phos/CAGAGCNNNNNNNNTCTACCATTATTTTTTTTTTTTTTTTTTTTTTTTTTTTTT
sc_ligation_RT_273	/5Phos/CAGAGCNNNNNNNNTTACGTATACTTTTTTTTTTTTTTTTTTTTTTTTTTTTTT
sc_ligation_RT_274	/5Phos/CAGAGCNNNNNNNNACTTAACTAGTTTTTTTTTTTTTTTTTTTTTTTTTTTTTT
sc_ligation_RT_275	/5Phos/CAGAGCNNNNNNNNGCAGACCGGTTTTTTTTTTTTTTTTTTTTTTTTTTTTTTT
sc_ligation_RT_276	/5Phos/CAGAGCNNNNNNNNTGAGTCCAGATTTTTTTTTTTTTTTTTTTTTTTTTTTTTT
sc_ligation_RT_277	/5Phos/CAGAGCNNNNNNNNTGGAGAATTCTTTTTTTTTTTTTTTTTTTTTTTTTTTTTT
sc_ligation_RT_278	/5Phos/CAGAGCNNNNNNNNGGCGAGCTTATTTTTTTTTTTTTTTTTTTTTTTTTTTTTT
sc_ligation_RT_279	/5Phos/CAGAGCNNNNNNNNTCGAGGAGTATTTTTTTTTTTTTTTTTTTTTTTTTTTTTT
sc_ligation_RT_280	/5Phos/CAGAGCNNNNNNNNCCTTACTCCTTTTTTTTTTTTTTTTTTTTTTTTTTTTTTT
sc_ligation_RT_281	/5Phos/CAGAGCNNNNNNNNTCAGACGAACTTTTTTTTTTTTTTTTTTTTTTTTTTTTTT
sc_ligation_RT_282	/5Phos/CAGAGCNNNNNNNNCCGTCCAGTATTTTTTTTTTTTTTTTTTTTTTTTTTTTTT
sc_ligation_RT_283	/5Phos/CAGAGCNNNNNNNNGTTCCGCTAATTTTTTTTTTTTTTTTTTTTTTTTTTTTTT
sc_ligation_RT_284	/5Phos/CAGAGCNNNNNNNNCAGATTCGATTTTTTTTTTTTTTTTTTTTTTTTTTTTTTT
sc_ligation_RT_285	/5Phos/CAGAGCNNNNNNNNTGCATATAACTTTTTTTTTTTTTTTTTTTTTTTTTTTTTT
sc_ligation_RT_286	/5Phos/CAGAGCNNNNNNNNTAGGCAGATATTTTTTTTTTTTTTTTTTTTTTTTTTTTTT
sc_ligation_RT_287	/5Phos/CAGAGCNNNNNNNNTATGCCGAGTTTTTTTTTTTTTTTTTTTTTTTTTTTTTTT
sc_ligation_RT_288	/5Phos/CAGAGCNNNNNNNNATAGTCGTAGTTTTTTTTTTTTTTTTTTTTTTTTTTTTTT
sc_ligation_RT_289	/5Phos/CAGAGCNNNNNNNNGGATGCAGCATTTTTTTTTTTTTTTTTTTTTTTTTTTTTT
sc_ligation_RT_290	/5Phos/CAGAGCNNNNNNNNCCGCTATATTTTTTTTTTTTTTTTTTTTTTTTTTTTTTTT
sc_ligation_RT_291	/5Phos/CAGAGCNNNNNNNNATCGAGTCGCTTTTTTTTTTTTTTTTTTTTTTTTTTTTTT
sc_ligation_RT_292	/5Phos/CAGAGCNNNNNNNNGCGACGCAGATTTTTTTTTTTTTTTTTTTTTTTTTTTTTT
sc_ligation_RT_293	/5Phos/CAGAGCNNNNNNNNAATGGTCGACTTTTTTTTTTTTTTTTTTTTTTTTTTTTTT
sc_ligation_RT_294	/5Phos/CAGAGCNNNNNNNNTGGAACTAGATTTTTTTTTTTTTTTTTTTTTTTTTTTTTT
sc_ligation_RT_295	/5Phos/CAGAGCNNNNNNNNGTCCAACTCATTTTTTTTTTTTTTTTTTTTTTTTTTTTTT
sc_ligation_RT_296	/5Phos/CAGAGCNNNNNNNNTTATAAGAACTTTTTTTTTTTTTTTTTTTTTTTTTTTTTT
sc_ligation_RT_297	/5Phos/CAGAGCNNNNNNNNCAAGCTTCATTTTTTTTTTTTTTTTTTTTTTTTTTTTTTT
sc_ligation_RT_298	/5Phos/CAGAGCNNNNNNNNCTGATTAAGATTTTTTTTTTTTTTTTTTTTTTTTTTTTTT
sc_ligation_RT_299	/5Phos/CAGAGCNNNNNNNNTACTTACTTATTTTTTTTTTTTTTTTTTTTTTTTTTTTTT
sc_ligation_RT_300	/5Phos/CAGAGCNNNNNNNNGGATCTGCAGTTTTTTTTTTTTTTTTTTTTTTTTTTTTTT
sc_ligation_RT_301	/5Phos/CAGAGCNNNNNNNNATGCAATATGTTTTTTTTTTTTTTTTTTTTTTTTTTTTTT
sc_ligation_RT_302	/5Phos/CAGAGCNNNNNNNNACTGCCGATATTTTTTTTTTTTTTTTTTTTTTTTTTTTTT
sc_ligation_RT_303	/5Phos/CAGAGCNNNNNNNNTCCAGAAGGTTTTTTTTTTTTTTTTTTTTTTTTTTTTTTT
sc_ligation_RT_304	/5Phos/CAGAGCNNNNNNNNTTCAAGACCATTTTTTTTTTTTTTTTTTTTTTTTTTTTTT
sc_ligation_RT_305	/5Phos/CAGAGCNNNNNNNNTATTACTCATTTTTTTTTTTTTTTTTTTTTTTTTTTTTTT
sc_ligation_RT_306	/5Phos/CAGAGCNNNNNNNNAACTGATCTTTTTTTTTTTTTTTTTTTTTTTTTTTTTTTT
sc_ligation_RT_307	/5Phos/CAGAGCNNNNNNNNCCGCGGACCGTTTTTTTTTTTTTTTTTTTTTTTTTTTTTT
sc_ligation_RT_308	/5Phos/CAGAGCNNNNNNNNAATACGCAGGTTTTTTTTTTTTTTTTTTTTTTTTTTTTTT
sc_ligation_RT_309	/5Phos/CAGAGCNNNNNNNNGGTCGCGTCATTTTTTTTTTTTTTTTTTTTTTTTTTTTTT
sc_ligation_RT_310	/5Phos/CAGAGCNNNNNNNNAATTATCAGCTTTTTTTTTTTTTTTTTTTTTTTTTTTTTT
sc_ligation_RT_311	/5Phos/CAGAGCNNNNNNNNATTGCGCTGATTTTTTTTTTTTTTTTTTTTTTTTTTTTTT
sc_ligation_RT_312	/5Phos/CAGAGCNNNNNNNNAGCTAAGGTATTTTTTTTTTTTTTTTTTTTTTTTTTTTTT
sc_ligation_RT_313	/5Phos/CAGAGCNNNNNNNNTCGTAGAGAATTTTTTTTTTTTTTTTTTTTTTTTTTTTTT
sc_ligation_RT_314	/5Phos/CAGAGCNNNNNNNNTGATGGCCTTTTTTTTTTTTTTTTTTTTTTTTTTTTTTTT
sc_ligation_RT_315	/5Phos/CAGAGCNNNNNNNNTGGAAGTACCTTTTTTTTTTTTTTTTTTTTTTTTTTTTTT
sc_ligation_RT_316	/5Phos/CAGAGCNNNNNNNNAGATATATCGTTTTTTTTTTTTTTTTTTTTTTTTTTTTTT
sc_ligation_RT_317	/5Phos/CAGAGCNNNNNNNNCATGCTGGTTTTTTTTTTTTTTTTTTTTTTTTTTTTTTTT
sc_ligation_RT_318	/5Phos/CAGAGCNNNNNNNNGCAAGGAATATTTTTTTTTTTTTTTTTTTTTTTTTTTTTT
sc_ligation_RT_319	/5Phos/CAGAGCNNNNNNNNGGCATAGCTTTTTTTTTTTTTTTTTTTTTTTTTTTTTTTT
sc_ligation_RT_320	/5Phos/CAGAGCNNNNNNNNAGTAAGCATATTTTTTTTTTTTTTTTTTTTTTTTTTTTTT
sc_ligation_RT_321	/5Phos/CAGAGCNNNNNNNNCGCCTCGAACTTTTTTTTTTTTTTTTTTTTTTTTTTTTTT
sc_ligation_RT_322	/5Phos/CAGAGCNNNNNNNNTTAGGATCTATTTTTTTTTTTTTTTTTTTTTTTTTTTTTT
sc_ligation_RT_323	/5Phos/CAGAGCNNNNNNNNACTACTGAAGTTTTTTTTTTTTTTTTTTTTTTTTTTTTTT
sc_ligation_RT_324	/5Phos/CAGAGCNNNNNNNNAATCTGGAGTTTTTTTTTTTTTTTTTTTTTTTTTTTTTTT
sc_ligation_RT_325	/5Phos/CAGAGCNNNNNNNNCTCGATGGAGTTTTTTTTTTTTTTTTTTTTTTTTTTTTTT
sc_ligation_RT_326	/5Phos/CAGAGCNNNNNNNNGTTGACGGCCTTTTTTTTTTTTTTTTTTTTTTTTTTTTTT
sc_ligation_RT_327	/5Phos/CAGAGCNNNNNNNNCTCGTCTAGGTTTTTTTTTTTTTTTTTTTTTTTTTTTTTT
sc_ligation_RT_328	/5Phos/CAGAGCNNNNNNNNGCTCTAACGATTTTTTTTTTTTTTTTTTTTTTTTTTTTTT
sc_ligation_RT_329	/5Phos/CAGAGCNNNNNNNNTGATAGAACGTTTTTTTTTTTTTTTTTTTTTTTTTTTTTT
sc_ligation_RT_330	/5Phos/CAGAGCNNNNNNNNTTAGATTCCGTTTTTTTTTTTTTTTTTTTTTTTTTTTTTT
sc_ligation_RT_331	/5Phos/CAGAGCNNNNNNNNTCGATATTGATTTTTTTTTTTTTTTTTTTTTTTTTTTTTT
sc_ligation_RT_332	/5Phos/CAGAGCNNNNNNNNCCAGGTCTACTTTTTTTTTTTTTTTTTTTTTTTTTTTTTT
sc_ligation_RT_333	/5Phos/CAGAGCNNNNNNNNTTGGTCATAATTTTTTTTTTTTTTTTTTTTTTTTTTTTTT
sc_ligation_RT_334	/5Phos/CAGAGCNNNNNNNNAACGGACCAATTTTTTTTTTTTTTTTTTTTTTTTTTTTTT
sc_ligation_RT_335	/5Phos/CAGAGCNNNNNNNNTTAACGTACCTTTTTTTTTTTTTTTTTTTTTTTTTTTTTT
sc_ligation_RT_336	/5Phos/CAGAGCNNNNNNNNGGACTCATTGTTTTTTTTTTTTTTTTTTTTTTTTTTTTTT
sc_ligation_RT_337	/5Phos/CAGAGCNNNNNNNNGAACTGCATCTTTTTTTTTTTTTTTTTTTTTTTTTTTTTT
sc_ligation_RT_338	/5Phos/CAGAGCNNNNNNNNACTCTCTCAATTTTTTTTTTTTTTTTTTTTTTTTTTTTTT
sc_ligation_RT_339	/5Phos/CAGAGCNNNNNNNNGTCGCTCAGTTTTTTTTTTTTTTTTTTTTTTTTTTTTTTT
sc_ligation_RT_340	/5Phos/CAGAGCNNNNNNNNCCGTCGGAGGTTTTTTTTTTTTTTTTTTTTTTTTTTTTTT
sc_ligation_RT_341	/5Phos/CAGAGCNNNNNNNNAGCGTCAATGTTTTTTTTTTTTTTTTTTTTTTTTTTTTTT
sc_ligation_RT_342	/5Phos/CAGAGCNNNNNNNNTTGAGTATCATTTTTTTTTTTTTTTTTTTTTTTTTTTTTT
sc_ligation_RT_343	/5Phos/CAGAGCNNNNNNNNTGAGGTAGAATTTTTTTTTTTTTTTTTTTTTTTTTTTTTT
sc_ligation_RT_344	/5Phos/CAGAGCNNNNNNNNGACTAGTCTATTTTTTTTTTTTTTTTTTTTTTTTTTTTTT
sc_ligation_RT_345	/5Phos/CAGAGCNNNNNNNNCTGCTTCGACTTTTTTTTTTTTTTTTTTTTTTTTTTTTTT
sc_ligation_RT_346	/5Phos/CAGAGCNNNNNNNNCCTAGCGCCTTTTTTTTTTTTTTTTTTTTTTTTTTTTTTT
sc_ligation_RT_347	/5Phos/CAGAGCNNNNNNNNAGTTGCATCTTTTTTTTTTTTTTTTTTTTTTTTTTTTTTT
sc_ligation_RT_348	/5Phos/CAGAGCNNNNNNNNAATTGCCTACTTTTTTTTTTTTTTTTTTTTTTTTTTTTTT
sc_ligation_RT_349	/5Phos/CAGAGCNNNNNNNNCGCCGCCTCCTTTTTTTTTTTTTTTTTTTTTTTTTTTTTT
sc_ligation_RT_350	/5Phos/CAGAGCNNNNNNNNCAAGTACTGGTTTTTTTTTTTTTTTTTTTTTTTTTTTTTT
sc_ligation_RT_351	/5Phos/CAGAGCNNNNNNNNCGGCGAGACCTTTTTTTTTTTTTTTTTTTTTTTTTTTTTT
sc_ligation_RT_352	/5Phos/CAGAGCNNNNNNNNGACCTCCGCCTTTTTTTTTTTTTTTTTTTTTTTTTTTTTT
sc_ligation_RT_353	/5Phos/CAGAGCNNNNNNNNTCTAGAACTATTTTTTTTTTTTTTTTTTTTTTTTTTTTTT
sc_ligation_RT_354	/5Phos/CAGAGCNNNNNNNNCGATCATTACTTTTTTTTTTTTTTTTTTTTTTTTTTTTTT
sc_ligation_RT_355	/5Phos/CAGAGCNNNNNNNNGACCTCTCTGTTTTTTTTTTTTTTTTTTTTTTTTTTTTTT
sc_ligation_RT_356	/5Phos/CAGAGCNNNNNNNNGGCTAATTAATTTTTTTTTTTTTTTTTTTTTTTTTTTTTT
sc_ligation_RT_357	/5Phos/CAGAGCNNNNNNNNGATGATCGTATTTTTTTTTTTTTTTTTTTTTTTTTTTTTT
sc_ligation_RT_358	/5Phos/CAGAGCNNNNNNNNGCTCTCGCCTTTTTTTTTTTTTTTTTTTTTTTTTTTTTTT
sc_ligation_RT_359	/5Phos/CAGAGCNNNNNNNNACTATCTTGATTTTTTTTTTTTTTTTTTTTTTTTTTTTTT
sc_ligation_RT_360	/5Phos/CAGAGCNNNNNNNNAGGTCAATTATTTTTTTTTTTTTTTTTTTTTTTTTTTTTT
sc_ligation_RT_361	/5Phos/CAGAGCNNNNNNNNAAGCCGGCTGTTTTTTTTTTTTTTTTTTTTTTTTTTTTTT
sc_ligation_RT_362	/5Phos/CAGAGCNNNNNNNNCATGCATCTCTTTTTTTTTTTTTTTTTTTTTTTTTTTTTT
sc_ligation_RT_363	/5Phos/CAGAGCNNNNNNNNTCCGGTAATCTTTTTTTTTTTTTTTTTTTTTTTTTTTTTT
sc_ligation_RT_364	/5Phos/CAGAGCNNNNNNNNACCGTTACGATTTTTTTTTTTTTTTTTTTTTTTTTTTTTT
sc_ligation_RT_365	/5Phos/CAGAGCNNNNNNNNTCCGTCGCCATTTTTTTTTTTTTTTTTTTTTTTTTTTTTT
sc_ligation_RT_366	/5Phos/CAGAGCNNNNNNNNGGCTATGACTTTTTTTTTTTTTTTTTTTTTTTTTTTTTTT
sc_ligation_RT_367	/5Phos/CAGAGCNNNNNNNNACTTCCGAATTTTTTTTTTTTTTTTTTTTTTTTTTTTTTT
sc_ligation_RT_368	/5Phos/CAGAGCNNNNNNNNAACTACCGACTTTTTTTTTTTTTTTTTTTTTTTTTTTTTT
sc_ligation_RT_369	/5Phos/CAGAGCNNNNNNNNCGTCCGTCCTTTTTTTTTTTTTTTTTTTTTTTTTTTTTTT
sc_ligation_RT_370	/5Phos/CAGAGCNNNNNNNNGGTCCAGGAGTTTTTTTTTTTTTTTTTTTTTTTTTTTTTT
sc_ligation_RT_371	/5Phos/CAGAGCNNNNNNNNAACGAGGCTATTTTTTTTTTTTTTTTTTTTTTTTTTTTTT
sc_ligation_RT_372	/5Phos/CAGAGCNNNNNNNNACGTTCAACCTTTTTTTTTTTTTTTTTTTTTTTTTTTTTT
sc_ligation_RT_373	/5Phos/CAGAGCNNNNNNNNACGAGGACCTTTTTTTTTTTTTTTTTTTTTTTTTTTTTTT
sc_ligation_RT_374	/5Phos/CAGAGCNNNNNNNNAACCTAGCTTTTTTTTTTTTTTTTTTTTTTTTTTTTTTTT
sc_ligation_RT_375	/5Phos/CAGAGCNNNNNNNNAGTCCGCGGATTTTTTTTTTTTTTTTTTTTTTTTTTTTTT
sc_ligation_RT_376	/5Phos/CAGAGCNNNNNNNNACTATCCGCATTTTTTTTTTTTTTTTTTTTTTTTTTTTTT
sc_ligation_RT_377	/5Phos/CAGAGCNNNNNNNNCGAGCTGCCATTTTTTTTTTTTTTTTTTTTTTTTTTTTTT
sc_ligation_RT_378	/5Phos/CAGAGCNNNNNNNNGTCATTGCGCTTTTTTTTTTTTTTTTTTTTTTTTTTTTTT
sc_ligation_RT_379	/5Phos/CAGAGCNNNNNNNNCAAGATTAAGTTTTTTTTTTTTTTTTTTTTTTTTTTTTTT
sc_ligation_RT_380	/5Phos/CAGAGCNNNNNNNNACGCAACTCCTTTTTTTTTTTTTTTTTTTTTTTTTTTTTT
sc_ligation_RT_381	/5Phos/CAGAGCNNNNNNNNTGATACGAGTTTTTTTTTTTTTTTTTTTTTTTTTTTTTTT
sc_ligation_RT_382	/5Phos/CAGAGCNNNNNNNNCATTATTACCTTTTTTTTTTTTTTTTTTTTTTTTTTTTTT
sc_ligation_RT_383	/5Phos/CAGAGCNNNNNNNNTCTATAAGGATTTTTTTTTTTTTTTTTTTTTTTTTTTTTT
sc_ligation_RT_384	/5Phos/CAGAGCNNNNNNNNTTGGAGTCGGTTTTTTTTTTTTTTTTTTTTTTTTTTTTTT
Ligation primers
Name	Sequence
sc_ligation_1	GCTCTGACAATCAAGT/ideoxyU/ACGACGCTCTTCCGATCTACTTGATTGT
sc_ligation_2	GCTCTGAAGCTGATTA/ideoxyU/ACGACGCTCTTCCGATCTTAATCAGCTT
sc_ligation_3	GCTCTGACCATTCTTA/ideoxyU/ACGACGCTCTTCCGATCTTAAGAATGGT
sc_ligation_4	GCTCTGAATAGGTTGT/ideoxyU/ACGACGCTCTTCCGATCTACAACCTATT
sc_ligation_5	GCTCTGATCTAGGAAT/ideoxyU/ACGACGCTCTTCCGATCTATTCCTAGAT
sc_ligation_6	GCTCTGAAGGAATCAA/ideoxyU/ACGACGCTCTTCCGATCTTTGATTCCTT
sc_ligation_7	GCTCTGAGTAATCCTT/ideoxyU/ACGACGCTCTTCCGATCTAAGGATTACT
sc_ligation_8	GCTCTGACTTATAGGA/ideoxyU/ACGACGCTCTTCCGATCTTCCTATAAGT
sc_ligation_9	GCTCTGACCTCTTATA/ideoxyU/ACGACGCTCTTCCGATCTTATAAGAGGT
sc_ligation_10	GCTCTGAAGGAGAATA/ideoxyU/ACGACGCTCTTCCGATCTTATTCTCCTT
sc_ligation_11	GCTCTGACTGGTATTA/ideoxyU/ACGACGCTCTTCCGATCTTAATACCAGT
sc_ligation_12	GCTCTGATAGAATCCA/ideoxyU/ACGACGCTCTTCCGATCTTGGATTCTAT
sc_ligation_13	GCTCTGAGAACTAAGA/ideoxyU/ACGACGCTCTTCCGATCTTCTTAGTTCT
sc_ligation_14	GCTCTGATTGGATAGA/ideoxyU/ACGACGCTCTTCCGATCTTCTATCCAAT
sc_ligation_15	GCTCTGACGATGAATT/ideoxyU/ACGACGCTCTTCCGATCTAATTCATCGT
sc_ligation_16	GCTCTGAAGTCATCTA/ideoxyU/ACGACGCTCTTCCGATCTTAGATGACTT
sc_ligation_17	GCTCTGAGAGGAATTT/ideoxyU/ACGACGCTCTTCCGATCTAAATTCCTCT
sc_ligation_18	GCTCTGAGTACCTAAT/ideoxyU/ACGACGCTCTTCCGATCTATTAGGTACT
sc_ligation_19	GCTCTGAATTCAACCA/ideoxyU/ACGACGCTCTTCCGATCTTGGTTGAATT
sc_ligation_20	GCTCTGACAACTAGTT/ideoxyU/ACGACGCTCTTCCGATCTAACTAGTTGT
sc_ligation_21	GCTCTGAAACGAAGAA/ideoxyU/ACGACGCTCTTCCGATCTTTCTTCGTTT
sc_ligation_22	GCTCTGACAAGAACTT/ideoxyU/ACGACGCTCTTCCGATCTAAGTTCTTGT
sc_ligation_23	GCTCTGATGAGTAAGT/ideoxyU/ACGACGCTCTTCCGATCTACTTACTCAT
sc_ligation_24	GCTCTGAAATCATGGT/ideoxyU/ACGACGCTCTTCCGATCTACCATGATTT
sc_ligation_25	GCTCTGAAAGTCGTTA/ideoxyU/ACGACGCTCTTCCGATCTTAACGACTTT
sc_ligation_26	GCTCTGAAGTAGCAAA/ideoxyU/ACGACGCTCTTCCGATCTTTTGCTACTT
sc_ligation_27	GCTCTGATGAACCTTA/ideoxyU/ACGACGCTCTTCCGATCTTAAGGTTCAT
sc_ligation_28	GCTCTGAGCTAATACT/ideoxyU/ACGACGCTCTTCCGATCTAGTATTAGCT
sc_ligation_29	GCTCTGAAATACCTGT/ideoxyU/ACGACGCTCTTCCGATCTACAGGTATTT
sc_ligation_30	GCTCTGAAAGATGGAA/ideoxyU/ACGACGCTCTTCCGATCTTTCCATCTTT
sc_ligation_31	GCTCTGAACGATCAAT/ideoxyU/ACGACGCTCTTCCGATCTATTGATCGTT
sc_ligation_32	GCTCTGATCAGATTCA/ideoxyU/ACGACGCTCTTCCGATCTTGAATCTGAT
sc_ligation_33	GCTCTGATTGGTTCTA/ideoxyU/ACGACGCTCTTCCGATCTTAGAACCAAT
sc_ligation_34	GCTCTGACAATGAGAA/ideoxyU/ACGACGCTCTTCCGATCTTTCTCATTGT
sc_ligation_35	GCTCTGAGATCCATAT/ideoxyU/ACGACGCTCTTCCGATCTATATGGATCT
sc_ligation_36	GCTCTGAATGACTGAT/ideoxyU/ACGACGCTCTTCCGATCTATCAGTCATT
sc_ligation_37	GCTCTGAATCGAGATA/ideoxyU/ACGACGCTCTTCCGATCTTATCTCGATT
sc_ligation_38	GCTCTGATTGGAGTTT/ideoxyU/ACGACGCTCTTCCGATCTAAACTCCAAT
sc_ligation_39	GCTCTGAAGATCTTGA/ideoxyU/ACGACGCTCTTCCGATCTTCAAGATCTT
sc_ligation_40	GCTCTGAGGAAGTTAT/ideoxyU/ACGACGCTCTTCCGATCTATAACTTCCT
sc_ligation_41	GCTCTGACATATCCTT/ideoxyU/ACGACGCTCTTCCGATCTAAGGATATGT
sc_ligation_42	GCTCTGACTTAGGTAA/ideoxyU/ACGACGCTCTTCCGATCTTTACCTAAGT
sc_ligation_43	GCTCTGAGTAGGATAT/ideoxyU/ACGACGCTCTTCCGATCTATATCCTACT
sc_ligation_44	GCTCTGACAGACTAAT/ideoxyU/ACGACGCTCTTCCGATCTATTAGTCTGT
sc_ligation_45	GCTCTGAATAAGGACA/ideoxyU/ACGACGCTCTTCCGATCTTGTCCTTATT
sc_ligation_46	GCTCTGATTGAGTCAA/ideoxyU/ACGACGCTCTTCCGATCTTTGACTCAAT
sc_ligation_47	GCTCTGAAACTGGTAT/ideoxyU/ACGACGCTCTTCCGATCTATACCAGTTT
sc_ligation_48	GCTCTGAAAGTTAGGA/ideoxyU/ACGACGCTCTTCCGATCTTCCTAACTTT
sc_ligation_49	GCTCTGATTAACGCC/ideoxyU/ACGACGCTCTTCCGATCTGGCGTTAAT
sc_ligation_50	GCTCTGAATGGTACC/ideoxyU/ACGACGCTCTTCCGATCTGGTACCATT
sc_ligation_51	GCTCTGACTGGTCAA/ideoxyU/ACGACGCTCTTCCGATCTTTGACCAGT
sc_ligation_52	GCTCTGACTCATTCG/ideoxyU/ACGACGCTCTTCCGATCTCGAATGAGT
sc_ligation_53	GCTCTGAGTTGCTTG/ideoxyU/ACGACGCTCTTCCGATCTCAAGCAACT
sc_ligation_54	GCTCTGAGGAACGAA/ideoxyU/ACGACGCTCTTCCGATCTTTCGTTCCT
sc_ligation_55	GCTCTGAAGCTCCAA/ideoxyU/ACGACGCTCTTCCGATCTTTGGAGCTT
sc_ligation_56	GCTCTGACCTTCCTA/ideoxyU/ACGACGCTCTTCCGATCTTAGGAAGGT
sc_ligation_57	GCTCTGAGGATACTG/ideoxyU/ACGACGCTCTTCCGATCTCAGTATCCT
sc_ligation_58	GCTCTGACCATTAGG/ideoxyU/ACGACGCTCTTCCGATCTCCTAATGGT
sc_ligation_59	GCTCTGAAGTTCCTC/ideoxyU/ACGACGCTCTTCCGATCTGAGGAACTT
sc_ligation_60	GCTCTGAATGCGACT/ideoxyU/ACGACGCTCTTCCGATCTAGTCGCATT
sc_ligation_61	GCTCTGAAGCAACGT/ideoxyU/ACGACGCTCTTCCGATCTACGTTGCTT
sc_ligation_62	GCTCTGACTTACGCT/ideoxyU/ACGACGCTCTTCCGATCTAGCGTAAGT
sc_ligation_63	GCTCTGAACCTTGCA/ideoxyU/ACGACGCTCTTCCGATCTTGCAAGGTT
sc_ligation_64	GCTCTGAAGTCGAAG/ideoxyU/ACGACGCTCTTCCGATCTCTTCGACTT
sc_ligation_65	GCTCTGAGCGGATAA/ideoxyU/ACGACGCTCTTCCGATCTTTATCCGCT
sc_ligation_66	GCTCTGAGGTACTCT/ideoxyU/ACGACGCTCTTCCGATCTAGAGTACCT
sc_ligation_67	GCTCTGAATGCTCAG/ideoxyU/ACGACGCTCTTCCGATCTCTGAGCATT
sc_ligation_68	GCTCTGACTAAGAGC/ideoxyU/ACGACGCTCTTCCGATCTGCTCTTAGT
sc_ligation_69	GCTCTGAATCCAGCA/ideoxyU/ACGACGCTCTTCCGATCTTGCTGGATT
sc_ligation_70	GCTCTGATCAAGCGT/ideoxyU/ACGACGCTCTTCCGATCTACGCTTGAT
sc_ligation_71	GCTCTGACAATGCTG/ideoxyU/ACGACGCTCTTCCGATCTCAGCATTGT
sc_ligation_72	GCTCTGACCAACCAT/ideoxyU/ACGACGCTCTTCCGATCTATGGTTGGT
sc_ligation_73	GCTCTGATAGGTACG/ideoxyU/ACGACGCTCTTCCGATCTCGTACCTAT
sc_ligation_74	GCTCTGATCAACGAG/ideoxyU/ACGACGCTCTTCCGATCTCTCGTTGAT
sc_ligation_75	GCTCTGACGTTGATG/ideoxyU/ACGACGCTCTTCCGATCTCATCAACGT
sc_ligation_76	GCTCTGAACTTGCTG/ideoxyU/ACGACGCTCTTCCGATCTCAGCAAGTT
sc_ligation_77	GCTCTGACTTCTCGA/ideoxyU/ACGACGCTCTTCCGATCTTCGAGAAGT
sc_ligation_78	GCTCTGAATCCTTGG/ideoxyU/ACGACGCTCTTCCGATCTCCAAGGATT
sc_ligation_79	GCTCTGATCGTCCTT/ideoxyU/ACGACGCTCTTCCGATCTAAGGACGAT
sc_ligation_80	GCTCTGATGCCAGTT/ideoxyU/ACGACGCTCTTCCGATCTAACTGGCAT
sc_ligation_81	GCTCTGACGCTTATC/ideoxyU/ACGACGCTCTTCCGATCTGATAAGCGT
sc_ligation_82	GCTCTGAAAGTACGC/ideoxyU/ACGACGCTCTTCCGATCTGCGTACTTT
sc_ligation_83	GCTCTGATCTTAGCC/ideoxyU/ACGACGCTCTTCCGATCTGGCTAAGAT
sc_ligation_84	GCTCTGATAAGGCAG/ideoxyU/ACGACGCTCTTCCGATCTCTGCCTTAT
sc_ligation_85	GCTCTGACCATAGAC/ideoxyU/ACGACGCTCTTCCGATCTGTCTATGGT
sc_ligation_86	GCTCTGAGAGAACTC/ideoxyU/ACGACGCTCTTCCGATCTGAGTTCTCT
sc_ligation_87	GCTCTGACGCAAGTA/ideoxyU/ACGACGCTCTTCCGATCTTACTTGCGT
sc_ligation_88	GCTCTGAGACGTATC/ideoxyU/ACGACGCTCTTCCGATCTGATACGTCT
sc_ligation_89	GCTCTGATCCGATCT/ideoxyU/ACGACGCTCTTCCGATCTAGATCGGAT
sc_ligation_90	GCTCTGAGAAGCTGA/ideoxyU/ACGACGCTCTTCCGATCTTCAGCTTCT
sc_ligation_91	GCTCTGATCCTTCGA/ideoxyU/ACGACGCTCTTCCGATCTTCGAAGGAT
sc_ligation_92	GCTCTGAAACTGACC/ideoxyU/ACGACGCTCTTCCGATCTGGTCAGTTT
sc_ligation_93	GCTCTGATCGCATCA/ideoxyU/ACGACGCTCTTCCGATCTTGATGCGAT
sc_ligation_94	GCTCTGACCTATCAG/ideoxyU/ACGACGCTCTTCCGATCTCTGATAGGT
sc_ligation_95	GCTCTGAGTAGAGAC/ideoxyU/ACGACGCTCTTCCGATCTGTCTCTACT
sc_ligation_96	GCTCTGAGTTACGAC/ideoxyU/ACGACGCTCTTCCGATCTGTCGTAACT
sc_ligation_97	GCTCTGACTATGGTTT/ideoxyU/ACGACGCTCTTCCGATCTAAACCATAGT
sc_ligation_98	GCTCTGAGTTCAGTTT/ideoxyU/ACGACGCTCTTCCGATCTAAACTGAACT
sc_ligation_99	GCTCTGAATCAGCTTT/ideoxyU/ACGACGCTCTTCCGATCTAAAGCTGATT
sc_ligation_100	GCTCTGAGAACGATTT/ideoxyU/ACGACGCTCTTCCGATCTAAATCGTTCT
sc_ligation_101	GCTCTGAAATGAGGTT/ideoxyU/ACGACGCTCTTCCGATCTAACCTCATTT
sc_ligation_102	GCTCTGACGCTCGTT/ideoxyU/ACGACGCTCTTCCGATCTAACGAGCGT
sc_ligation_103	GCTCTGAATGATCGTT/ideoxyU/ACGACGCTCTTCCGATCTAACGATCATT
sc_ligation_104	GCTCTGAGACGCGTT/ideoxyU/ACGACGCTCTTCCGATCTAACGCGTCT
sc_ligation_105	GCTCTGAGATTACGTT/ideoxyU/ACGACGCTCTTCCGATCTAACGTAATCT
sc_ligation_106	GCTCTGAATCCAAGTT/ideoxyU/ACGACGCTCTTCCGATCTAACTTGGATT
sc_ligation_107	GCTCTGATAAGGTCTT/ideoxyU/ACGACGCTCTTCCGATCTAAGACCTTAT
sc_ligation_108	GCTCTGAATACTGCTT/ideoxyU/ACGACGCTCTTCCGATCTAAGCAGTATT
sc_ligation_109	GCTCTGAGTAGCCTT/ideoxyU/ACGACGCTCTTCCGATCTAAGGCTACT
sc_ligation_110	GCTCTGAAACGTACTT/ideoxyU/ACGACGCTCTTCCGATCTAAGTACGTTT
sc_ligation_111	GCTCTGACCAATACTT/ideoxyU/ACGACGCTCTTCCGATCTAAGTATTGGT
sc_ligation_112	GCTCTGATTCGGTATT/ideoxyU/ACGACGCTCTTCCGATCTAATACCGAAT
sc_ligation_113	GCTCTGATACTGGATT/ideoxyU/ACGACGCTCTTCCGATCTAATCCAGTAT
sc_ligation_114	GCTCTGACCTAGAATT/ideoxyU/ACGACGCTCTTCCGATCTAATTCTAGGT
sc_ligation_115	GCTCTGATAGCATTGT/ideoxyU/ACGACGCTCTTCCGATCTACAATGCTAT
sc_ligation_116	GCTCTGATTACCATGT/ideoxyU/ACGACGCTCTTCCGATCTACATGGTAAT
sc_ligation_117	GCTCTGATACGAATGT/ideoxyU/ACGACGCTCTTCCGATCTACATTCGTAT
sc_ligation_118	GCTCTGAGAACCGGT/ideoxyU/ACGACGCTCTTCCGATCTACCGGTTCT
sc_ligation_119	GCTCTGATATTGAGGT/ideoxyU/ACGACGCTCTTCCGATCTACCTCAATAT
sc_ligation_120	GCTCTGATGCGTCGT/ideoxyU/ACGACGCTCTTCCGATCTACGACGCAT
sc_ligation_121	GCTCTGATGATATCGT/ideoxyU/ACGACGCTCTTCCGATCTACGATATCAT
sc_ligation_122	GCTCTGATATAAGCGT/ideoxyU/ACGACGCTCTTCCGATCTACGCTTATAT
sc_ligation_123	GCTCTGACGTTCCGT/ideoxyU/ACGACGCTCTTCCGATCTACGGAACGT
sc_ligation_124	GCTCTGACTAGACGT/ideoxyU/ACGACGCTCTTCCGATCTACGTCTAGT
sc_ligation_125	GCTCTGAGTATTCAGT/ideoxyU/ACGACGCTCTTCCGATCTACTGAATACT
sc_ligation_126	GCTCTGAGGTCCAGT/ideoxyU/ACGACGCTCTTCCGATCTACTGGACCT
sc_ligation_127	GCTCTGAATAACCAGT/ideoxyU/ACGACGCTCTTCCGATCTACTGGTTATT
sc_ligation_128	GCTCTGAACCATAAGT/ideoxyU/ACGACGCTCTTCCGATCTACTTATGGTT
sc_ligation_129	GCTCTGAACGGAAGT/ideoxyU/ACGACGCTCTTCCGATCTACTTCCGTT
sc_ligation_130	GCTCTGAGGAGTTCT/ideoxyU/ACGACGCTCTTCCGATCTAGAACTCCT
sc_ligation_131	GCTCTGACTTACTTCT/ideoxyU/ACGACGCTCTTCCGATCTAGAAGTAAGT
sc_ligation_132	GCTCTGATTCATCTCT/ideoxyU/ACGACGCTCTTCCGATCTAGAGATGAAT
sc_ligation_133	GCTCTGACATGCTCT/ideoxyU/ACGACGCTCTTCCGATCTAGAGCATGT
sc_ligation_134	GCTCTGACGACCTCT/ideoxyU/ACGACGCTCTTCCGATCTAGAGGTCGT
sc_ligation_135	GCTCTGAGTTGAATCT/ideoxyU/ACGACGCTCTTCCGATCTAGATTCAACT
sc_ligation_136	GCTCTGAAACCAATCT/ideoxyU/ACGACGCTCTTCCGATCTAGATTGGTTT
sc_ligation_137	GCTCTGAAGTTATGCT/ideoxyU/ACGACGCTCTTCCGATCTAGCATAACTT
sc_ligation_138	GCTCTGACATAATGCT/ideoxyU/ACGACGCTCTTCCGATCTAGCATTATGT
sc_ligation_139	GCTCTGACGATAGCT/ideoxyU/ACGACGCTCTTCCGATCTAGCTATCGT
sc_ligation_140	GCTCTGAGATTATCCT/ideoxyU/ACGACGCTCTTCCGATCTAGGATAATCT
sc_ligation_141	GCTCTGATTCCGCCT/ideoxyU/ACGACGCTCTTCCGATCTAGGCGGAAT
sc_ligation_142	GCTCTGAACGAGCCT/ideoxyU/ACGACGCTCTTCCGATCTAGGCTCGTT
sc_ligation_143	GCTCTGATGGCTACT/ideoxyU/ACGACGCTCTTCCGATCTAGTAGCCAT
sc_ligation_144	GCTCTGATGGTTAACT/ideoxyU/ACGACGCTCTTCCGATCTAGTTAACCAT
sc_ligation_145	GCTCTGATTCGCTTAT/ideoxyU/ACGACGCTCTTCCGATCTATAAGCGAAT
sc_ligation_146	GCTCTGACAGGATTAT/ideoxyU/ACGACGCTCTTCCGATCTATAATCCTGT
sc_ligation_147	GCTCTGAGAGTAGTAT/ideoxyU/ACGACGCTCTTCCGATCTATACTACTCT
sc_ligation_148	GCTCTGAGTCAACTAT/ideoxyU/ACGACGCTCTTCCGATCTATAGTTGACT
sc_ligation_149	GCTCTGATCCAGATAT/ideoxyU/ACGACGCTCTTCCGATCTATATCTGGAT
sc_ligation_150	GCTCTGAATGGCATAT/ideoxyU/ACGACGCTCTTCCGATCTATATGCCATT
sc_ligation_151	GCTCTGACGTATTGAT/ideoxyU/ACGACGCTCTTCCGATCTATCAATACGT
sc_ligation_152	GCTCTGATCATCAGAT/ideoxyU/ACGACGCTCTTCCGATCTATCTGATGAT
sc_ligation_153	GCTCTGATCTGAAGAT/ideoxyU/ACGACGCTCTTCCGATCTATCTTCAGAT
sc_ligation_154	GCTCTGATGAATGCAT/ideoxyU/ACGACGCTCTTCCGATCTATGCATTCAT
sc_ligation_155	GCTCTGAGGAAGCAT/ideoxyU/ACGACGCTCTTCCGATCTATGCTTCCT
sc_ligation_156	GCTCTGAATAGTCCAT/ideoxyU/ACGACGCTCTTCCGATCTATGGACTATT
sc_ligation_157	GCTCTGAAGTTACCAT/ideoxyU/ACGACGCTCTTCCGATCTATGGTAACTT
sc_ligation_158	GCTCTGAGGCATTAAT/ideoxyU/ACGACGCTCTTCCGATCTATTAATGCCT
sc_ligation_159	GCTCTGAGATGGTAAT/ideoxyU/ACGACGCTCTTCCGATCTATTACCATCT
sc_ligation_160	GCTCTGATGCTTGAAT/ideoxyU/ACGACGCTCTTCCGATCTATTCAAGCAT
sc_ligation_161	GCTCTGAATTGCGAAT/ideoxyU/ACGACGCTCTTCCGATCTATTCGCAATT
sc_ligation_162	GCTCTGACTCCGAAT/ideoxyU/ACGACGCTCTTCCGATCTATTCGGAGT
sc_ligation_163	GCTCTGATTCCTCAAT/ideoxyU/ACGACGCTCTTCCGATCTATTGAGGAAT
sc_ligation_164	GCTCTGAGAGAGTTG/ideoxyU/ACGACGCTCTTCCGATCTCAACTCTCT
sc_ligation_165	GCTCTGAACGCCTTG/ideoxyU/ACGACGCTCTTCCGATCTCAAGGCGTT
sc_ligation_166	GCTCTGACTGATCTG/ideoxyU/ACGACGCTCTTCCGATCTCAGATCAGT
sc_ligation_167	GCTCTGAGAGTCCTG/ideoxyU/ACGACGCTCTTCCGATCTCAGGACTCT
sc_ligation_168	GCTCTGAGCGGTATG/ideoxyU/ACGACGCTCTTCCGATCTCATACCGCT
sc_ligation_169	GCTCTGATGGATTGG/ideoxyU/ACGACGCTCTTCCGATCTCCAATCCAT
sc_ligation_170	GCTCTGAAAGGCTGG/ideoxyU/ACGACGCTCTTCCGATCTCCAGCCTTT
sc_ligation_171	GCTCTGAGACGATGG/ideoxyU/ACGACGCTCTTCCGATCTCCATCGTCT
sc_ligation_172	GCTCTGATTGGTCGG/ideoxyU/ACGACGCTCTTCCGATCTCCGACCAAT
sc_ligation_173	GCTCTGAATCGACGG/ideoxyU/ACGACGCTCTTCCGATCTCCGTCGATT
sc_ligation_174	GCTCTGAACTGCAGG/ideoxyU/ACGACGCTCTTCCGATCTCCTGCAGTT
sc_ligation_175	GCTCTGAGTAGCAGG/ideoxyU/ACGACGCTCTTCCGATCTCCTGCTACT
sc_ligation_176	GCTCTGAGGTCTTCG/ideoxyU/ACGACGCTCTTCCGATCTCGAAGACCT
sc_ligation_177	GCTCTGATTGCCTCG/ideoxyU/ACGACGCTCTTCCGATCTCGAGGCAAT
sc_ligation_178	GCTCTGAGCGAATCG/ideoxyU/ACGACGCTCTTCCGATCTCGATTCGCT
sc_ligation_179	GCTCTGAGAATGGCG/ideoxyU/ACGACGCTCTTCCGATCTCGCCATTCT
sc_ligation_180	GCTCTGAGGTTAGCG/ideoxyU/ACGACGCTCTTCCGATCTCGCTAACCT
sc_ligation_181	GCTCTGAAAGCAGCG/ideoxyU/ACGACGCTCTTCCGATCTCGCTGCTTT
sc_ligation_182	GCTCTGAAGGTTCCG/ideoxyU/ACGACGCTCTTCCGATCTCGGAACCTT
sc_ligation_183	GCTCTGACCTTACCG/ideoxyU/ACGACGCTCTTCCGATCTCGGTAAGGT
sc_ligation_184	GCTCTGAAGCCTACG/ideoxyU/ACGACGCTCTTCCGATCTCGTAGGCTT
sc_ligation_185	GCTCTGAGGAAGACG/ideoxyU/ACGACGCTCTTCCGATCTCGTCTTCCT
sc_ligation_186	GCTCTGAGATCAACG/ideoxyU/ACGACGCTCTTCCGATCTCGTTGATCT
sc_ligation_187	GCTCTGAGTCGTTAG/ideoxyU/ACGACGCTCTTCCGATCTCTAACGACT
sc_ligation_188	GCTCTGACCAGGTAG/ideoxyU/ACGACGCTCTTCCGATCTCTACCTGGT
sc_ligation_189	GCTCTGATGATGGAG/ideoxyU/ACGACGCTCTTCCGATCTCTCCATCAT
sc_ligation_190	GCTCTGACATGCGAG/ideoxyU/ACGACGCTCTTCCGATCTCTCGCATGT
sc_ligation_191	GCTCTGAGCTCAGAG/ideoxyU/ACGACGCTCTTCCGATCTCTCTGAGCT
sc_ligation_192	GCTCTGAAACGTCAG/ideoxyU/ACGACGCTCTTCCGATCTCTGACGTTT
sc_ligation_193	GCTCTGACCGCTAAG/ideoxyU/ACGACGCTCTTCCGATCTCTTAGCGGT
sc_ligation_194	GCTCTGAATTCGGTC/ideoxyU/ACGACGCTCTTCCGATCTGACCGAATT
sc_ligation_195	GCTCTGATGGTAGTC/ideoxyU/ACGACGCTCTTCCGATCTGACTACCAT
sc_ligation_196	GCTCTGAAGCGAGTC/ideoxyU/ACGACGCTCTTCCGATCTGACTCGCTT
sc_ligation_197	GCTCTGACGTCAGTC/ideoxyU/ACGACGCTCTTCCGATCTGACTGACGT
sc_ligation_198	GCTCTGATACCGCTC/ideoxyU/ACGACGCTCTTCCGATCTGAGCGGTAT
sc_ligation_199	GCTCTGACCGTAATC/ideoxyU/ACGACGCTCTTCCGATCTGATTACGGT
sc_ligation_200	GCTCTGAAACGTTGC/ideoxyU/ACGACGCTCTTCCGATCTGCAACGTTT
sc_ligation_201	GCTCTGATTGAGCGC/ideoxyU/ACGACGCTCTTCCGATCTGCGCTCAAT
sc_ligation_202	GCTCTGATTCTCCGC/ideoxyU/ACGACGCTCTTCCGATCTGCGGAGAAT
sc_ligation_203	GCTCTGATACGACGC/ideoxyU/ACGACGCTCTTCCGATCTGCGTCGTAT
sc_ligation_204	GCTCTGATCTCGAGC/ideoxyU/ACGACGCTCTTCCGATCTGCTCGAGAT
sc_ligation_205	GCTCTGACCAGAAGC/ideoxyU/ACGACGCTCTTCCGATCTGCTTCTGGT
sc_ligation_206	GCTCTGAACCTATCC/ideoxyU/ACGACGCTCTTCCGATCTGGATAGGTT
sc_ligation_207	GCTCTGATAGTCGCC/ideoxyU/ACGACGCTCTTCCGATCTGGCGACTAT
sc_ligation_208	GCTCTGAAATGCGCC/ideoxyU/ACGACGCTCTTCCGATCTGGCGCATTT
sc_ligation_209	GCTCTGATCCGTACC/ideoxyU/ACGACGCTCTTCCGATCTGGTACGGAT
sc_ligation_210	GCTCTGAGGACTACC/ideoxyU/ACGACGCTCTTCCGATCTGGTAGTCCT
sc_ligation_211	GCTCTGAGAAGGACC/ideoxyU/ACGACGCTCTTCCGATCTGGTCCTTCT
sc_ligation_212	GCTCTGAAGAGGTAC/ideoxyU/ACGACGCTCTTCCGATCTGTACCTCTT
sc_ligation_213	GCTCTGAATCGCTAC/ideoxyU/ACGACGCTCTTCCGATCTGTAGCGATT
sc_ligation_214	GCTCTGAACTCCGAC/ideoxyU/ACGACGCTCTTCCGATCTGTCGGAGTT
sc_ligation_215	GCTCTGATTGCCGAC/ideoxyU/ACGACGCTCTTCCGATCTGTCGGCAAT
sc_ligation_216	GCTCTGAGCTGGAAC/ideoxyU/ACGACGCTCTTCCGATCTGTTCCAGCT
sc_ligation_217	GCTCTGACAGCGAAC/ideoxyU/ACGACGCTCTTCCGATCTGTTCGCTGT
sc_ligation_218	GCTCTGAGGAGCAAC/ideoxyU/ACGACGCTCTTCCGATCTGTTGCTCCT
sc_ligation_219	GCTCTGACGGTCTTA/ideoxyU/ACGACGCTCTTCCGATCTTAAGACCGT
sc_ligation_220	GCTCTGACCGAGCTA/ideoxyU/ACGACGCTCTTCCGATCTTAGCTCGGT
sc_ligation_221	GCTCTGACCTGGATA/ideoxyU/ACGACGCTCTTCCGATCTTATCCAGGT
sc_ligation_222	GCTCTGAACCGCTGA/ideoxyU/ACGACGCTCTTCCGATCTTCAGCGGTT
sc_ligation_223	GCTCTGACCAACTGA/ideoxyU/ACGACGCTCTTCCGATCTTCAGTTGGT
sc_ligation_224	GCTCTGATGACCGGA/ideoxyU/ACGACGCTCTTCCGATCTTCCGGTCAT
sc_ligation_225	GCTCTGACATACGGA/ideoxyU/ACGACGCTCTTCCGATCTTCCGTATGT
sc_ligation_226	GCTCTGAAGGTAGGA/ideoxyU/ACGACGCTCTTCCGATCTTCCTACCTT
sc_ligation_227	GCTCTGAATGCGCGA/ideoxyU/ACGACGCTCTTCCGATCTTCGCGCATT
sc_ligation_228	GCTCTGAGGTACCGA/ideoxyU/ACGACGCTCTTCCGATCTTCGGTACCT
sc_ligation_229	GCTCTGACGCTACGA/ideoxyU/ACGACGCTCTTCCGATCTTCGTAGCGT
sc_ligation_230	GCTCTGATTCGGAGA/ideoxyU/ACGACGCTCTTCCGATCTTCTCCGAAT
sc_ligation_231	GCTCTGATGGAGAGA/ideoxyU/ACGACGCTCTTCCGATCTTCTCTCCAT
sc_ligation_232	GCTCTGACGCGTTCA/ideoxyU/ACGACGCTCTTCCGATCTTGAACGCGT
sc_ligation_233	GCTCTGACCAAGGCA/ideoxyU/ACGACGCTCTTCCGATCTTGCCTTGGT
sc_ligation_234	GCTCTGAACTACGCA/ideoxyU/ACGACGCTCTTCCGATCTTGCGTAGTT
sc_ligation_235	GCTCTGATAGGAGCA/ideoxyU/ACGACGCTCTTCCGATCTTGCTCCTAT
sc_ligation_236	GCTCTGAGAGGTCCA/ideoxyU/ACGACGCTCTTCCGATCTTGGACCTCT
sc_ligation_237	GCTCTGATCAGGCCA/ideoxyU/ACGACGCTCTTCCGATCTTGGCCTGAT
sc_ligation_238	GCTCTGAGCCTACCA/ideoxyU/ACGACGCTCTTCCGATCTTGGTAGGCT
sc_ligation_239	GCTCTGATTCGACCA/ideoxyU/ACGACGCTCTTCCGATCTTGGTCGAAT
sc_ligation_240	GCTCTGAGGAGACCA/ideoxyU/ACGACGCTCTTCCGATCTTGGTCTCCT
sc_ligation_241	GCTCTGACGTCGGAA/ideoxyU/ACGACGCTCTTCCGATCTTTCCGACGT
sc_ligation_242	GCTCTGACGAGAGAA/ideoxyU/ACGACGCTCTTCCGATCTTTCTCTCGT
sc_ligation_243	GCTCTGAGGCCAGAA/ideoxyU/ACGACGCTCTTCCGATCTTTCTGGCCT
sc_ligation_244	GCTCTGAGGACTCAA/ideoxyU/ACGACGCTCTTCCGATCTTTGAGTCCT
sc_ligation_245	GCTCTGAGACCGCAA/ideoxyU/ACGACGCTCTTCCGATCTTTGCGGTCT
sc_ligation_246	GCTCTGAGTCGCCAA/ideoxyU/ACGACGCTCTTCCGATCTTTGGCGACT
sc_ligation_247	GCTCTGACAGCGGTT/ideoxyU/ACGACGCTCTTCCGATCTAACCGCTGT
sc_ligation_248	GCTCTGAGGCATCTT/ideoxyU/ACGACGCTCTTCCGATCTAAGATGCCT
sc_ligation_249	GCTCTGATGGCGCTT/ideoxyU/ACGACGCTCTTCCGATCTAAGCGCCAT
sc_ligation_250	GCTCTGAGCATTGGT/ideoxyU/ACGACGCTCTTCCGATCTACCAATGCT
sc_ligation_251	GCTCTGAGCTACGGT/ideoxyU/ACGACGCTCTTCCGATCTACCGTAGCT
sc_ligation_252	GCTCTGACCGAAGGT/ideoxyU/ACGACGCTCTTCCGATCTACCTTCGGT
sc_ligation_253	GCTCTGAAACCTCGT/ideoxyU/ACGACGCTCTTCCGATCTACGAGGTTT
sc_ligation_254	GCTCTGATATGGCGT/ideoxyU/ACGACGCTCTTCCGATCTACGCCATAT
sc_ligation_255	GCTCTGAATTGCCGT/ideoxyU/ACGACGCTCTTCCGATCTACGGCAATT
sc_ligation_256	GCTCTGATCGTTGCT/ideoxyU/ACGACGCTCTTCCGATCTAGCAACGAT
sc_ligation_257	GCTCTGATGATGCCT/ideoxyU/ACGACGCTCTTCCGATCTAGGCATCAT
sc_ligation_258	GCTCTGAGCGCAACT/ideoxyU/ACGACGCTCTTCCGATCTAGTTGCGCT
sc_ligation_259	GCTCTGAGCGACTAT/ideoxyU/ACGACGCTCTTCCGATCTATAGTCGCT
sc_ligation_260	GCTCTGACTTGGCAT/ideoxyU/ACGACGCTCTTCCGATCTATGCCAAGT
sc_ligation_261	GCTCTGACTCTCCAT/ideoxyU/ACGACGCTCTTCCGATCTATGGAGAGT
sc_ligation_262	GCTCTGAGCTGCCAT/ideoxyU/ACGACGCTCTTCCGATCTATGGCAGCT
sc_ligation_263	GCTCTGATACGCCAT/ideoxyU/ACGACGCTCTTCCGATCTATGGCGTAT
sc_ligation_264	GCTCTGACCGGCAAT/ideoxyU/ACGACGCTCTTCCGATCTATTGCCGGT
sc_ligation_265	GCTCTGACTGCGTTG/ideoxyU/ACGACGCTCTTCCGATCTCAACGCAGT
sc_ligation_266	GCTCTGAACCGATTG/ideoxyU/ACGACGCTCTTCCGATCTCAATCGGTT
sc_ligation_267	GCTCTGAGCCTTCTG/ideoxyU/ACGACGCTCTTCCGATCTCAGAAGGCT
sc_ligation_268	GCTCTGAGTCCGATG/ideoxyU/ACGACGCTCTTCCGATCTCATCGGACT
sc_ligation_269	GCTCTGAGGTTCTGG/ideoxyU/ACGACGCTCTTCCGATCTCCAGAACCT
sc_ligation_270	GCTCTGACCTGATGG/ideoxyU/ACGACGCTCTTCCGATCTCCATCAGGT
sc_ligation_271	GCTCTGACGCAATGG/ideoxyU/ACGACGCTCTTCCGATCTCCATTGCGT
sc_ligation_272	GCTCTGATCTCTCGG/ideoxyU/ACGACGCTCTTCCGATCTCCGAGAGAT
sc_ligation_273	GCTCTGAAACTCCGG/ideoxyU/ACGACGCTCTTCCGATCTCCGGAGTTT
sc_ligation_274	GCTCTGACTATCCGG/ideoxyU/ACGACGCTCTTCCGATCTCCGGATAGT
sc_ligation_275	GCTCTGATGAGACGG/ideoxyU/ACGACGCTCTTCCGATCTCCGTCTCAT
sc_ligation_276	GCTCTGATCAGGAGG/ideoxyU/ACGACGCTCTTCCGATCTCCTCCTGAT
sc_ligation_277	GCTCTGATATCGTCG/ideoxyU/ACGACGCTCTTCCGATCTCGACGATAT
sc_ligation_278	GCTCTGAGCATCTCG/ideoxyU/ACGACGCTCTTCCGATCTCGAGATGCT
sc_ligation_279	GCTCTGATTACGGCG/ideoxyU/ACGACGCTCTTCCGATCTCGCCGTAAT
sc_ligation_280	GCTCTGATGGAACCG/ideoxyU/ACGACGCTCTTCCGATCTCGGTTCCAT
sc_ligation_281	GCTCTGACTTCGACG/ideoxyU/ACGACGCTCTTCCGATCTCGTCGAAGT
sc_ligation_282	GCTCTGATGCCGTAG/ideoxyU/ACGACGCTCTTCCGATCTCTACGGCAT
sc_ligation_283	GCTCTGACGTACTAG/ideoxyU/ACGACGCTCTTCCGATCTCTAGTACGT
sc_ligation_284	GCTCTGAGGAGATAG/ideoxyU/ACGACGCTCTTCCGATCTCTATCTCCT
sc_ligation_285	GCTCTGACTCTGGAG/ideoxyU/ACGACGCTCTTCCGATCTCTCCAGAGT
sc_ligation_286	GCTCTGAAACCGGAG/ideoxyU/ACGACGCTCTTCCGATCTCTCCGGTTT
sc_ligation_287	GCTCTGAACGAGGAG/ideoxyU/ACGACGCTCTTCCGATCTCTCCTCGTT
sc_ligation_288	GCTCTGACAGTAGAG/ideoxyU/ACGACGCTCTTCCGATCTCTCTACTGT
sc_ligation_289	GCTCTGATTCAGCAG/ideoxyU/ACGACGCTCTTCCGATCTCTGCTGAAT
sc_ligation_290	GCTCTGATCTTCCAG/ideoxyU/ACGACGCTCTTCCGATCTCTGGAAGAT
sc_ligation_291	GCTCTGAGCATGAAG/ideoxyU/ACGACGCTCTTCCGATCTCTTCATGCT
sc_ligation_292	GCTCTGACATCGTTC/ideoxyU/ACGACGCTCTTCCGATCTGAACGATGT
sc_ligation_293	GCTCTGAAGCCGTTC/ideoxyU/ACGACGCTCTTCCGATCTGAACGGCTT
sc_ligation_294	GCTCTGAGCCTCTTC/ideoxyU/ACGACGCTCTTCCGATCTGAAGAGGCT
sc_ligation_295	GCTCTGATCCTGGTC/ideoxyU/ACGACGCTCTTCCGATCTGACCAGGAT
sc_ligation_296	GCTCTGATGACGGTC/ideoxyU/ACGACGCTCTTCCGATCTGACCGTCAT
sc_ligation_297	GCTCTGACGAACGTC/ideoxyU/ACGACGCTCTTCCGATCTGACGTTCGT
sc_ligation_298	GCTCTGAGCCAAGTC/ideoxyU/ACGACGCTCTTCCGATCTGACTTGGCT
sc_ligation_299	GCTCTGACTAGTCTC/ideoxyU/ACGACGCTCTTCCGATCTGAGACTAGT
sc_ligation_300	GCTCTGAGGTCGATC/ideoxyU/ACGACGCTCTTCCGATCTGATCGACCT
sc_ligation_301	GCTCTGAGCGATTGC/ideoxyU/ACGACGCTCTTCCGATCTGCAATCGCT
sc_ligation_302	GCTCTGAGTATCTGC/ideoxyU/ACGACGCTCTTCCGATCTGCAGATACT
sc_ligation_303	GCTCTGACTGGATGC/ideoxyU/ACGACGCTCTTCCGATCTGCATCCAGT
sc_ligation_304	GCTCTGAACCATGGC/ideoxyU/ACGACGCTCTTCCGATCTGCCATGGTT
sc_ligation_305	GCTCTGATATACCGC/ideoxyU/ACGACGCTCTTCCGATCTGCGGTATAT
sc_ligation_306	GCTCTGAGCTTCAGC/ideoxyU/ACGACGCTCTTCCGATCTGCTGAAGCT
sc_ligation_307	GCTCTGATAGCCAGC/ideoxyU/ACGACGCTCTTCCGATCTGCTGGCTAT
sc_ligation_308	GCTCTGATCAAGTCC/ideoxyU/ACGACGCTCTTCCGATCTGGACTTGAT
sc_ligation_309	GCTCTGATGAGCTCC/ideoxyU/ACGACGCTCTTCCGATCTGGAGCTCAT
sc_ligation_310	GCTCTGAGAACCTCC/ideoxyU/ACGACGCTCTTCCGATCTGGAGGTTCT
sc_ligation_311	GCTCTGAGACTTGCC/ideoxyU/ACGACGCTCTTCCGATCTGGCAAGTCT
sc_ligation_312	GCTCTGAAGTAAGCC/ideoxyU/ACGACGCTCTTCCGATCTGGCTTACTT
sc_ligation_313	GCTCTGACGTAGACC/ideoxyU/ACGACGCTCTTCCGATCTGGTCTACGT
sc_ligation_314	GCTCTGACTCGAACC/ideoxyU/ACGACGCTCTTCCGATCTGGTTCGAGT
sc_ligation_315	GCTCTGATGCCAACC/ideoxyU/ACGACGCTCTTCCGATCTGGTTGGCAT
sc_ligation_316	GCTCTGAGAGCTTAC/ideoxyU/ACGACGCTCTTCCGATCTGTAAGCTCT
sc_ligation_317	GCTCTGACTCCTTAC/ideoxyU/ACGACGCTCTTCCGATCTGTAAGGAGT
sc_ligation_318	GCTCTGACCGTCTAC/ideoxyU/ACGACGCTCTTCCGATCTGTAGACGGT
sc_ligation_319	GCTCTGATGCGATAC/ideoxyU/ACGACGCTCTTCCGATCTGTATCGCAT
sc_ligation_320	GCTCTGACAGATGAC/ideoxyU/ACGACGCTCTTCCGATCTGTCATCTGT
sc_ligation_321	GCTCTGATGCAGGAC/ideoxyU/ACGACGCTCTTCCGATCTGTCCTGCAT
sc_ligation_322	GCTCTGACTTGCAAC/ideoxyU/ACGACGCTCTTCCGATCTGTTGCAAGT
sc_ligation_323	GCTCTGACCTTAGTTA/ideoxyU/ACGACGCTCTTCCGATCTTAACTAAGGT
sc_ligation_324	GCTCTGACTACCGTA/ideoxyU/ACGACGCTCTTCCGATCTTACGGTAGT
sc_ligation_325	GCTCTGAATAGGAGTA/ideoxyU/ACGACGCTCTTCCGATCTTACTCCTATT
sc_ligation_326	GCTCTGATACTCTCTA/ideoxyU/ACGACGCTCTTCCGATCTTAGAGAGTAT
sc_ligation_327	GCTCTGAAGGCTCTA/ideoxyU/ACGACGCTCTTCCGATCTTAGAGCCTT
sc_ligation_328	GCTCTGAAATTGGCTA/ideoxyU/ACGACGCTCTTCCGATCTTAGCCAATTT
sc_ligation_329	GCTCTGATAGTACCTA/ideoxyU/ACGACGCTCTTCCGATCTTAGGTACTAT
sc_ligation_330	GCTCTGAAGGTAACTA/ideoxyU/ACGACGCTCTTCCGATCTTAGTTACCTT
sc_ligation_331	GCTCTGAAGCCTTATA/ideoxyU/ACGACGCTCTTCCGATCTTATAAGGCTT
sc_ligation_332	GCTCTGAACGCATATA/ideoxyU/ACGACGCTCTTCCGATCTTATATGCGTT
sc_ligation_333	GCTCTGACTCATGATA/ideoxyU/ACGACGCTCTTCCGATCTTATCATGAGT
sc_ligation_334	GCTCTGAAGTTCGATA/ideoxyU/ACGACGCTCTTCCGATCTTATCGAACTT
sc_ligation_335	GCTCTGACAAGTCATA/ideoxyU/ACGACGCTCTTCCGATCTTATGACTTGT
sc_ligation_336	GCTCTGAGTTCTCATA/ideoxyU/ACGACGCTCTTCCGATCTTATGAGAACT
sc_ligation_337	GCTCTGAAATCGCATA/ideoxyU/ACGACGCTCTTCCGATCTTATGCGATTT
sc_ligation_338	GCTCTGAAAGACCATA/ideoxyU/ACGACGCTCTTCCGATCTTATGGTCTTT
sc_ligation_339	GCTCTGAGCCGAATA/ideoxyU/ACGACGCTCTTCCGATCTTATTCGGCT
sc_ligation_340	GCTCTGAGAGTCAATA/ideoxyU/ACGACGCTCTTCCGATCTTATTGACTCT
sc_ligation_341	GCTCTGAACCTCAATA/ideoxyU/ACGACGCTCTTCCGATCTTATTGAGGTT
sc_ligation_342	GCTCTGATCTCCTGA/ideoxyU/ACGACGCTCTTCCGATCTTCAGGAGAT
sc_ligation_343	GCTCTGAACTCTATGA/ideoxyU/ACGACGCTCTTCCGATCTTCATAGAGTT
sc_ligation_344	GCTCTGAAGCCATGA/ideoxyU/ACGACGCTCTTCCGATCTTCATGGCTT
sc_ligation_345	GCTCTGAGCTTAATGA/ideoxyU/ACGACGCTCTTCCGATCTTCATTAAGCT
sc_ligation_346	GCTCTGATAACTTGGA/ideoxyU/ACGACGCTCTTCCGATCTTCCAAGTTAT
sc_ligation_347	GCTCTGAACTATTGGA/ideoxyU/ACGACGCTCTTCCGATCTTCCAATAGTT
sc_ligation_348	GCTCTGAAGAATAGGA/ideoxyU/ACGACGCTCTTCCGATCTTCCTATTCTT
sc_ligation_349	GCTCTGACTCGAGGA/ideoxyU/ACGACGCTCTTCCGATCTTCCTCGAGT
sc_ligation_350	GCTCTGAAAGATTCGA/ideoxyU/ACGACGCTCTTCCGATCTTCGAATCTTT
sc_ligation_351	GCTCTGAGTTGGCGA/ideoxyU/ACGACGCTCTTCCGATCTTCGCCAACT
sc_ligation_352	GCTCTGAAATAGACGA/ideoxyU/ACGACGCTCTTCCGATCTTCGTCTATTT
sc_ligation_353	GCTCTGACAGAACGA/ideoxyU/ACGACGCTCTTCCGATCTTCGTTCTGT
sc_ligation_354	GCTCTGAGTAAGTAGA/ideoxyU/ACGACGCTCTTCCGATCTTCTACTTACT
sc_ligation_355	GCTCTGAATTCCTAGA/ideoxyU/ACGACGCTCTTCCGATCTTCTAGGAATT
sc_ligation_356	GCTCTGAAGGTATAGA/ideoxyU/ACGACGCTCTTCCGATCTTCTATACCTT
sc_ligation_357	GCTCTGAGAGCGAGA/ideoxyU/ACGACGCTCTTCCGATCTTCTCGCTCT
sc_ligation_358	GCTCTGAACGAATTCA/ideoxyU/ACGACGCTCTTCCGATCTTGAATTCGTT
sc_ligation_359	GCTCTGACCTCGTCA/ideoxyU/ACGACGCTCTTCCGATCTTGACGAGGT
sc_ligation_360	GCTCTGATGATTCTCA/ideoxyU/ACGACGCTCTTCCGATCTTGAGAATCAT
sc_ligation_361	GCTCTGATCTAACTCA/ideoxyU/ACGACGCTCTTCCGATCTTGAGTTAGAT
sc_ligation_362	GCTCTGAAGAAGATCA/ideoxyU/ACGACGCTCTTCCGATCTTGATCTTCTT
sc_ligation_363	GCTCTGATAATAGGCA/ideoxyU/ACGACGCTCTTCCGATCTTGCCTATTAT
sc_ligation_364	GCTCTGAGAATTAGCA/ideoxyU/ACGACGCTCTTCCGATCTTGCTAATTCT
sc_ligation_365	GCTCTGATTAGTAGCA/ideoxyU/ACGACGCTCTTCCGATCTTGCTACTAAT
sc_ligation_366	GCTCTGACGGATCCA/ideoxyU/ACGACGCTCTTCCGATCTTGGATCCGT
sc_ligation_367	GCTCTGACTATTACCA/ideoxyU/ACGACGCTCTTCCGATCTTGGTAATAGT
sc_ligation_368	GCTCTGAGTCTTAACA/ideoxyU/ACGACGCTCTTCCGATCTTGTTAAGACT
sc_ligation_369	GCTCTGAGCTCATTAA/ideoxyU/ACGACGCTCTTCCGATCTTTAATGAGCT
sc_ligation_370	GCTCTGATGCCTATAA/ideoxyU/ACGACGCTCTTCCGATCTTTATAGGCAT
sc_ligation_371	GCTCTGATCAGTTGAA/ideoxyU/ACGACGCTCTTCCGATCTTTCAACTGAT
sc_ligation_372	GCTCTGAGTAATGGAA/ideoxyU/ACGACGCTCTTCCGATCTTTCCATTACT
sc_ligation_373	GCTCTGATTATGCGAA/ideoxyU/ACGACGCTCTTCCGATCTTTCGCATAAT
sc_ligation_374	GCTCTGATCCGCGAA/ideoxyU/ACGACGCTCTTCCGATCTTTCGCGGAT
sc_ligation_375	GCTCTGAAGCTTAGAA/ideoxyU/ACGACGCTCTTCCGATCTTTCTAAGCTT
sc_ligation_376	GCTCTGAACTAGAGAA/ideoxyU/ACGACGCTCTTCCGATCTTTCTCTAGTT
sc_ligation_377	GCTCTGAGGTTAAGAA/ideoxyU/ACGACGCTCTTCCGATCTTTCTTAACCT
sc_ligation_378	GCTCTGAAGACTTCAA/ideoxyU/ACGACGCTCTTCCGATCTTTGAAGTCTT
sc_ligation_379	GCTCTGAATCTCTCAA/ideoxyU/ACGACGCTCTTCCGATCTTTGAGAGATT
sc_ligation_380	GCTCTGATAACTCCAA/ideoxyU/ACGACGCTCTTCCGATCTTTGGAGTTAT
sc_ligation_381	GCTCTGATATTGCCAA/ideoxyU/ACGACGCTCTTCCGATCTTTGGCAATAT
sc_ligation_382	GCTCTGATGAGCCAA/ideoxyU/ACGACGCTCTTCCGATCTTTGGCTCAT
sc_ligation_383	GCTCTGACTTAACCAA/ideoxyU/ACGACGCTCTTCCGATCTTTGGTTAAGT
sc_ligation_384	GCTCTGACTAAGCAAA/ideoxyU/ACGACGCTCTTCCGATCTTTTGCTTAGT
PCR P5 sequences
Name	sequence
P5-1	AATGATACGGCGACCACCGAGATCTACACCTCCATCGAGACACTCTTTCCCTACACGACGCTCTTCCGATCT
P5-2	AATGATACGGCGACCACCGAGATCTACACTTGGTAGTCGACACTCTTTCCCTACACGACGCTCTTCCGATCT
P5-3	AATGATACGGCGACCACCGAGATCTACACGGCCGTCAACACACTCTTTCCCTACACGACGCTCTTCCGATCT
P5-4	AATGATACGGCGACCACCGAGATCTACACCCTAGACGAGACACTCTTTCCCTACACGACGCTCTTCCGATCT
P5-5	AATGATACGGCGACCACCGAGATCTACACTCGTTAGAGCACACTCTTTCCCTACACGACGCTCTTCCGATCT
P5-6	AATGATACGGCGACCACCGAGATCTACACCGTTCTATCAACACTCTTTCCCTACACGACGCTCTTCCGATCT
P5-7	AATGATACGGCGACCACCGAGATCTACACCGGAATCTAAACACTCTTTCCCTACACGACGCTCTTCCGATCT
P5-8	AATGATACGGCGACCACCGAGATCTACACATGACTGATCACACTCTTTCCCTACACGACGCTCTTCCGATCT
P5-9	AATGATACGGCGACCACCGAGATCTACACTCAATATCGAACACTCTTTCCCTACACGACGCTCTTCCGATCT
P5-10	AATGATACGGCGACCACCGAGATCTACACGTAGACCTGGACACTCTTTCCCTACACGACGCTCTTCCGATCT
P5-11	AATGATACGGCGACCACCGAGATCTACACTTATGACCAAACACTCTTTCCCTACACGACGCTCTTCCGATCT
P5-12	AATGATACGGCGACCACCGAGATCTACACTTGGTCCGTTACACTCTTTCCCTACACGACGCTCTTCCGATCT
P5-13	AATGATACGGCGACCACCGAGATCTACACGGTACGTTAAACACTCTTTCCCTACACGACGCTCTTCCGATCT
P5-14	AATGATACGGCGACCACCGAGATCTACACCAATGAGTCCACACTCTTTCCCTACACGACGCTCTTCCGATCT
P5-15	AATGATACGGCGACCACCGAGATCTACACGATGCAGTTCACACTCTTTCCCTACACGACGCTCTTCCGATCT
P5-16	AATGATACGGCGACCACCGAGATCTACACCCATCGTTCCACACTCTTTCCCTACACGACGCTCTTCCGATCT
P5-17	AATGATACGGCGACCACCGAGATCTACACTTGAGAGAGTACACTCTTTCCCTACACGACGCTCTTCCGATCT
P5-18	AATGATACGGCGACCACCGAGATCTACACACTGAGCGACACACTCTTTCCCTACACGACGCTCTTCCGATCT
P5-19	AATGATACGGCGACCACCGAGATCTACACTGAGGAATCAACACTCTTTCCCTACACGACGCTCTTCCGATCT
P5-20	AATGATACGGCGACCACCGAGATCTACACCCTCCGACGGACACTCTTTCCCTACACGACGCTCTTCCGATCT
P5-21	AATGATACGGCGACCACCGAGATCTACACCATTGACGCTACACTCTTTCCCTACACGACGCTCTTCCGATCT
P5-22	AATGATACGGCGACCACCGAGATCTACACTCGTCCTTCGACACTCTTTCCCTACACGACGCTCTTCCGATCT
P5-23	AATGATACGGCGACCACCGAGATCTACACTGATACTCAAACACTCTTTCCCTACACGACGCTCTTCCGATCT
P5-24	AATGATACGGCGACCACCGAGATCTACACTTCTACCTCAACACTCTTTCCCTACACGACGCTCTTCCGATCT
P5-25	AATGATACGGCGACCACCGAGATCTACACTCGTCGGAACACACTCTTTCCCTACACGACGCTCTTCCGATCT
P5-26	AATGATACGGCGACCACCGAGATCTACACATCGAGATGAACACTCTTTCCCTACACGACGCTCTTCCGATCT
P5-27	AATGATACGGCGACCACCGAGATCTACACTAGACTAGTCACACTCTTTCCCTACACGACGCTCTTCCGATCT
P5-28	AATGATACGGCGACCACCGAGATCTACACGTCGAAGCAGACACTCTTTCCCTACACGACGCTCTTCCGATCT
P5-29	AATGATACGGCGACCACCGAGATCTACACAGGCGCTAGGACACTCTTTCCCTACACGACGCTCTTCCGATCT
P5-30	AATGATACGGCGACCACCGAGATCTACACAGATGCAACTACACTCTTTCCCTACACGACGCTCTTCCGATCT
P5-31	AATGATACGGCGACCACCGAGATCTACACAAGCCTACGAACACTCTTTCCCTACACGACGCTCTTCCGATCT
P5-32	AATGATACGGCGACCACCGAGATCTACACGTAGGCAATTACACTCTTTCCCTACACGACGCTCTTCCGATCT
P5-33	AATGATACGGCGACCACCGAGATCTACACTGCCAGTTGCACACTCTTTCCCTACACGACGCTCTTCCGATCT
P5-34	AATGATACGGCGACCACCGAGATCTACACCTTAGGTATCACACTCTTTCCCTACACGACGCTCTTCCGATCT
P5-35	AATGATACGGCGACCACCGAGATCTACACGAGACCTACCACACTCTTTCCCTACACGACGCTCTTCCGATCT
P5-36	AATGATACGGCGACCACCGAGATCTACACATTGACCGAGACACTCTTTCCCTACACGACGCTCTTCCGATCT
P5-37	AATGATACGGCGACCACCGAGATCTACACGGAGGCGGCGACACTCTTTCCCTACACGACGCTCTTCCGATCT
P5-38	AATGATACGGCGACCACCGAGATCTACACCCAGTACTTGACACTCTTTCCCTACACGACGCTCTTCCGATCT
P5-39	AATGATACGGCGACCACCGAGATCTACACGGTCTCGCCGACACTCTTTCCCTACACGACGCTCTTCCGATCT
P5-40	AATGATACGGCGACCACCGAGATCTACACGGCGGAGGTCACACTCTTTCCCTACACGACGCTCTTCCGATCT
P5-41	AATGATACGGCGACCACCGAGATCTACACTAGTTCTAGAACACTCTTTCCCTACACGACGCTCTTCCGATCT
P5-42	AATGATACGGCGACCACCGAGATCTACACTTGGAGTTAGACACTCTTTCCCTACACGACGCTCTTCCGATCT
P5-43	AATGATACGGCGACCACCGAGATCTACACAGATCTTGGTACACTCTTTCCCTACACGACGCTCTTCCGATCT
P5-44	AATGATACGGCGACCACCGAGATCTACACGTAATGATCGACACTCTTTCCCTACACGACGCTCTTCCGATCT
P5-45	AATGATACGGCGACCACCGAGATCTACACCAGAGAGGTCACACTCTTTCCCTACACGACGCTCTTCCGATCT
P5-46	AATGATACGGCGACCACCGAGATCTACACTTAATTAGCCACACTCTTTCCCTACACGACGCTCTTCCGATCT
P5-47	AATGATACGGCGACCACCGAGATCTACACCTCTAACTCGACACTCTTTCCCTACACGACGCTCTTCCGATCT
P5-48	AATGATACGGCGACCACCGAGATCTACACTACGATCATCACACTCTTTCCCTACACGACGCTCTTCCGATCT
P5-49	AATGATACGGCGACCACCGAGATCTACACAGGCGAGAGCACACTCTTTCCCTACACGACGCTCTTCCGATCT
P5-50	AATGATACGGCGACCACCGAGATCTACACTCAAGATAGTACACTCTTTCCCTACACGACGCTCTTCCGATCT
P5-51	AATGATACGGCGACCACCGAGATCTACACTAATTGACCTACACTCTTTCCCTACACGACGCTCTTCCGATCT
P5-52	AATGATACGGCGACCACCGAGATCTACACCAGCCGGCTTACACTCTTTCCCTACACGACGCTCTTCCGATCT
P5-53	AATGATACGGCGACCACCGAGATCTACACAGAACCGGAGACACTCTTTCCCTACACGACGCTCTTCCGATCT
P5-54	AATGATACGGCGACCACCGAGATCTACACGAGATGCATGACACTCTTTCCCTACACGACGCTCTTCCGATCT
P5-55	AATGATACGGCGACCACCGAGATCTACACGATTACCGGAACACTCTTTCCCTACACGACGCTCTTCCGATCT
P5-56	AATGATACGGCGACCACCGAGATCTACACTCGTAACGGTACACTCTTTCCCTACACGACGCTCTTCCGATCT
P5-57	AATGATACGGCGACCACCGAGATCTACACTGGCGACGGAACACTCTTTCCCTACACGACGCTCTTCCGATCT
P5-58	AATGATACGGCGACCACCGAGATCTACACAGTCATAGCCACACTCTTTCCCTACACGACGCTCTTCCGATCT
P5-59	AATGATACGGCGACCACCGAGATCTACACGTCAAGTCCAACACTCTTTCCCTACACGACGCTCTTCCGATCT
P5-60	AATGATACGGCGACCACCGAGATCTACACATTCGGAAGTACACTCTTTCCCTACACGACGCTCTTCCGATCT
P5-61	AATGATACGGCGACCACCGAGATCTACACGTCGGTAGTTACACTCTTTCCCTACACGACGCTCTTCCGATCT
P5-62	AATGATACGGCGACCACCGAGATCTACACAGGACGGACGACACTCTTTCCCTACACGACGCTCTTCCGATCT
P5-63	AATGATACGGCGACCACCGAGATCTACACCTCCTGGACCACACTCTTTCCCTACACGACGCTCTTCCGATCT
P5-64	AATGATACGGCGACCACCGAGATCTACACTAGCCTCGTTACACTCTTTCCCTACACGACGCTCTTCCGATCT
P5-65	AATGATACGGCGACCACCGAGATCTACACGGTTGAACGTACACTCTTTCCCTACACGACGCTCTTCCGATCT
P5-66	AATGATACGGCGACCACCGAGATCTACACAGGTCCTCGTACACTCTTTCCCTACACGACGCTCTTCCGATCT
P5-67	AATGATACGGCGACCACCGAGATCTACACGGAAGTTATAACACTCTTTCCCTACACGACGCTCTTCCGATCT
P5-68	AATGATACGGCGACCACCGAGATCTACACTGGTAATCCTACACTCTTTCCCTACACGACGCTCTTCCGATCT
P5-69	AATGATACGGCGACCACCGAGATCTACACAAGCTAGGTTACACTCTTTCCCTACACGACGCTCTTCCGATCT
P5-70	AATGATACGGCGACCACCGAGATCTACACTCCGCGGACTACACTCTTTCCCTACACGACGCTCTTCCGATCT
P5-71	AATGATACGGCGACCACCGAGATCTACACTGCGGATAGTACACTCTTTCCCTACACGACGCTCTTCCGATCT
P5-72	AATGATACGGCGACCACCGAGATCTACACTGGCAGCTCGACACTCTTTCCCTACACGACGCTCTTCCGATCT
P5-73	AATGATACGGCGACCACCGAGATCTACACTGCTACGGTCACACTCTTTCCCTACACGACGCTCTTCCGATCT
P5-74	AATGATACGGCGACCACCGAGATCTACACGCGCAATGACACACTCTTTCCCTACACGACGCTCTTCCGATCT
P5-75	AATGATACGGCGACCACCGAGATCTACACCTTAATCTTGACACTCTTTCCCTACACGACGCTCTTCCGATCT
P5-76	AATGATACGGCGACCACCGAGATCTACACGGAGTTGCGTACACTCTTTCCCTACACGACGCTCTTCCGATCT
P5-77	AATGATACGGCGACCACCGAGATCTACACACTCGTATCAACACTCTTTCCCTACACGACGCTCTTCCGATCT
P5-78	AATGATACGGCGACCACCGAGATCTACACGGTAATAATGACACTCTTTCCCTACACGACGCTCTTCCGATCT
P5-79	AATGATACGGCGACCACCGAGATCTACACTCCTTATAGAACACTCTTTCCCTACACGACGCTCTTCCGATCT
P5-80	AATGATACGGCGACCACCGAGATCTACACCCGACTCCAAACACTCTTTCCCTACACGACGCTCTTCCGATCT
P5-81	AATGATACGGCGACCACCGAGATCTACACGCCAAGCTTGACACTCTTTCCCTACACGACGCTCTTCCGATCT
P5-82	AATGATACGGCGACCACCGAGATCTACACCATATCCTATACACTCTTTCCCTACACGACGCTCTTCCGATCT
P5-83	AATGATACGGCGACCACCGAGATCTACACACCTACGCCAACACTCTTTCCCTACACGACGCTCTTCCGATCT
P5-84	AATGATACGGCGACCACCGAGATCTACACGGAATTCAGTACACTCTTTCCCTACACGACGCTCTTCCGATCT
P5-85	AATGATACGGCGACCACCGAGATCTACACTGGCGTAGAAACACTCTTTCCCTACACGACGCTCTTCCGATCT
P5-86	AATGATACGGCGACCACCGAGATCTACACATTGCGGCCAACACTCTTTCCCTACACGACGCTCTTCCGATCT
P5-87	AATGATACGGCGACCACCGAGATCTACACTTCAGCTTGGACACTCTTTCCCTACACGACGCTCTTCCGATCT
P5-88	AATGATACGGCGACCACCGAGATCTACACCCATCTGGCAACACTCTTTCCCTACACGACGCTCTTCCGATCT
P5-89	AATGATACGGCGACCACCGAGATCTACACCTTATAAGTTACACTCTTTCCCTACACGACGCTCTTCCGATCT
P5-90	AATGATACGGCGACCACCGAGATCTACACGATTAGATGAACACTCTTTCCCTACACGACGCTCTTCCGATCT
P5-91	AATGATACGGCGACCACCGAGATCTACACTATAGGATCTACACTCTTTCCCTACACGACGCTCTTCCGATCT
P5-92	AATGATACGGCGACCACCGAGATCTACACAGCTTATAGGACACTCTTTCCCTACACGACGCTCTTCCGATCT
P5-93	AATGATACGGCGACCACCGAGATCTACACGTCTGCAATCACACTCTTTCCCTACACGACGCTCTTCCGATCT
P5-94	AATGATACGGCGACCACCGAGATCTACACCGCCTCTTATACACTCTTTCCCTACACGACGCTCTTCCGATCT
P5-95	AATGATACGGCGACCACCGAGATCTACACGTTGGATCTTACACTCTTTCCCTACACGACGCTCTTCCGATCT
P5-96	AATGATACGGCGACCACCGAGATCTACACGCGATTGCAGACACTCTTTCCCTACACGACGCTCTTCCGATCT
PCR P7 primers
Name	sequence
P7-1	CAAGCAGAAGACGGCATACGAGATccgaatccgaGTCTCGTGGGCTCGG
P7-2	CAAGCAGAAGACGGCATACGAGATataagccggaGTCTCGTGGGCTCGG
P7-3	CAAGCAGAAGACGGCATACGAGATccggcggcgaGTCTCGTGGGCTCGG
P7-4	CAAGCAGAAGACGGCATACGAGATggcttgccaaGTCTCGTGGGCTCGG
P7-5	CAAGCAGAAGACGGCATACGAGATccgctagctgGTCTCGTGGGCTCGG
P7-6	CAAGCAGAAGACGGCATACGAGATcttatcctacGTCTCGTGGGCTCGG
P7-7	CAAGCAGAAGACGGCATACGAGATtgagctacttGTCTCGTGGGCTCGG
P7-8	CAAGCAGAAGACGGCATACGAGATtcaggacttaGTCTCGTGGGCTCGG
P7-9	CAAGCAGAAGACGGCATACGAGATccgcagccgcGTCTCGTGGGCTCGG
P7-10	CAAGCAGAAGACGGCATACGAGATtgcgcctggtGTCTCGTGGGCTCGG
P7-11	CAAGCAGAAGACGGCATACGAGATaatcatacggGTCTCGTGGGCTCGG
P7-12	CAAGCAGAAGACGGCATACGAGATcgccaatcaaGTCTCGTGGGCTCGG
P7-13	CAAGCAGAAGACGGCATACGAGATcaaggcttagGTCTCGTGGGCTCGG
P7-14	CAAGCAGAAGACGGCATACGAGATgcgctcgacgGTCTCGTGGGCTCGG
P7-15	CAAGCAGAAGACGGCATACGAGATtccagcaataGTCTCGTGGGCTCGG
P7-16	CAAGCAGAAGACGGCATACGAGATcatgagaactGTCTCGTGGGCTCGG
P7-17	CAAGCAGAAGACGGCATACGAGATaacgtaatctGTCTCGTGGGCTCGG
P7-18	CAAGCAGAAGACGGCATACGAGATattctcctctGTCTCGTGGGCTCGG
P7-19	CAAGCAGAAGACGGCATACGAGATtctgcgcgttGTCTCGTGGGCTCGG
P7-20	CAAGCAGAAGACGGCATACGAGATgctcatatgcGTCTCGTGGGCTCGG
P7-21	CAAGCAGAAGACGGCATACGAGATagcggtaacgGTCTCGTGGGCTCGG
P7-22	CAAGCAGAAGACGGCATACGAGATaatgaatagtGTCTCGTGGGCTCGG
P7-23	CAAGCAGAAGACGGCATACGAGATccgtatctggGTCTCGTGGGCTCGG
P7-24	CAAGCAGAAGACGGCATACGAGATccttagtctgGTCTCGTGGGCTCGG
P7-25	CAAGCAGAAGACGGCATACGAGATacctagttagGTCTCGTGGGCTCGG
P7-26	CAAGCAGAAGACGGCATACGAGATataggagtacGTCTCGTGGGCTCGG
P7-27	CAAGCAGAAGACGGCATACGAGATctacgacgagGTCTCGTGGGCTCGG
P7-28	CAAGCAGAAGACGGCATACGAGATagtcgagttcGTCTCGTGGGCTCGG
P7-29	CAAGCAGAAGACGGCATACGAGATtggtccagtcGTCTCGTGGGCTCGG
P7-30	CAAGCAGAAGACGGCATACGAGATatctaagcaaGTCTCGTGGGCTCGG
P7-31	CAAGCAGAAGACGGCATACGAGATcgaattcgttGTCTCGTGGGCTCGG
P7-32	CAAGCAGAAGACGGCATACGAGATcagcgatagaGTCTCGTGGGCTCGG
P7-33	CAAGCAGAAGACGGCATACGAGATggtcgctatgGTCTCGTGGGCTCGG
P7-34	CAAGCAGAAGACGGCATACGAGATatccgttagcGTCTCGTGGGCTCGG
P7-35	CAAGCAGAAGACGGCATACGAGATtcgcaattagGTCTCGTGGGCTCGG
P7-36	CAAGCAGAAGACGGCATACGAGATggctggctagGTCTCGTGGGCTCGG
P7-37	CAAGCAGAAGACGGCATACGAGATacggtcttgcGTCTCGTGGGCTCGG
P7-38	CAAGCAGAAGACGGCATACGAGATgctccattcgGTCTCGTGGGCTCGG
P7-39	CAAGCAGAAGACGGCATACGAGATacgataagcgGTCTCGTGGGCTCGG
P7-40	CAAGCAGAAGACGGCATACGAGATaccatagcgcGTCTCGTGGGCTCGG
P7-41	CAAGCAGAAGACGGCATACGAGATctcttagcggGTCTCGTGGGCTCGG
P7-42	CAAGCAGAAGACGGCATACGAGATtgattcaactGTCTCGTGGGCTCGG
P7-43	CAAGCAGAAGACGGCATACGAGATtatggccgcgGTCTCGTGGGCTCGG
P7-44	CAAGCAGAAGACGGCATACGAGATagaggtcgcaGTCTCGTGGGCTCGG
P7-45	CAAGCAGAAGACGGCATACGAGATaggagattgaGTCTCGTGGGCTCGG
P7-46	CAAGCAGAAGACGGCATACGAGATggctatatagGTCTCGTGGGCTCGG
P7-47	CAAGCAGAAGACGGCATACGAGATtcgcgtacttGTCTCGTGGGCTCGG
P7-48	CAAGCAGAAGACGGCATACGAGATaataataatgGTCTCGTGGGCTCGG
P7-49	CAAGCAGAAGACGGCATACGAGATttcgttccatGTCTCGTGGGCTCGG
P7-50	CAAGCAGAAGACGGCATACGAGATtacctaatcaGTCTCGTGGGCTCGG
P7-51	CAAGCAGAAGACGGCATACGAGATaagtaatattGTCTCGTGGGCTCGG
P7-52	CAAGCAGAAGACGGCATACGAGATagctaagaatGTCTCGTGGGCTCGG
P7-53	CAAGCAGAAGACGGCATACGAGATgtcgaggtatGTCTCGTGGGCTCGG
P7-54	CAAGCAGAAGACGGCATACGAGATttattagtagGTCTCGTGGGCTCGG
P7-55	CAAGCAGAAGACGGCATACGAGATtgcgaagatcGTCTCGTGGGCTCGG
P7-56	CAAGCAGAAGACGGCATACGAGATaactacggctGTCTCGTGGGCTCGG
P7-57	CAAGCAGAAGACGGCATACGAGATaacggaacgcGTCTCGTGGGCTCGG
P7-58	CAAGCAGAAGACGGCATACGAGATgatgctacgaGTCTCGTGGGCTCGG
P7-59	CAAGCAGAAGACGGCATACGAGATatctgccaatGTCTCGTGGGCTCGG
P7-60	CAAGCAGAAGACGGCATACGAGATatcgtatcaaGTCTCGTGGGCTCGG
P7-61	CAAGCAGAAGACGGCATACGAGATaacgcctctaGTCTCGTGGGCTCGG
P7-62	CAAGCAGAAGACGGCATACGAGATacggcaaccaGTCTCGTGGGCTCGG
P7-63	CAAGCAGAAGACGGCATACGAGATcaggctaagaGTCTCGTGGGCTCGG
P7-64	CAAGCAGAAGACGGCATACGAGATcgcaatatcaGTCTCGTGGGCTCGG
P7-65	CAAGCAGAAGACGGCATACGAGATttcgataaccGTCTCGTGGGCTCGG
P7-66	CAAGCAGAAGACGGCATACGAGATaacctcaagaGTCTCGTGGGCTCGG
P7-67	CAAGCAGAAGACGGCATACGAGATcaggcgccatGTCTCGTGGGCTCGG
P7-68	CAAGCAGAAGACGGCATACGAGATaactattataGTCTCGTGGGCTCGG
P7-69	CAAGCAGAAGACGGCATACGAGATaagttacctaGTCTCGTGGGCTCGG
P7-70	CAAGCAGAAGACGGCATACGAGATcggcagaggaGTCTCGTGGGCTCGG
P7-71	CAAGCAGAAGACGGCATACGAGATgcctcaataaGTCTCGTGGGCTCGG
P7-72	CAAGCAGAAGACGGCATACGAGATttaacgccgtGTCTCGTGGGCTCGG
P7-73	CAAGCAGAAGACGGCATACGAGATcatacgatgcGTCTCGTGGGCTCGG
P7-74	CAAGCAGAAGACGGCATACGAGATaagctgacctGTCTCGTGGGCTCGG
P7-75	CAAGCAGAAGACGGCATACGAGATgagtccttatGTCTCGTGGGCTCGG
P7-76	CAAGCAGAAGACGGCATACGAGATcctacggcaaGTCTCGTGGGCTCGG
P7-77	CAAGCAGAAGACGGCATACGAGATaatattcgaaGTCTCGTGGGCTCGG
P7-78	CAAGCAGAAGACGGCATACGAGATttcaagaatcGTCTCGTGGGCTCGG
P7-79	CAAGCAGAAGACGGCATACGAGATatgctcgcaaGTCTCGTGGGCTCGG
P7-80	CAAGCAGAAGACGGCATACGAGATggagtaagccGTCTCGTGGGCTCGG
P7-81	CAAGCAGAAGACGGCATACGAGATttatcgtattGTCTCGTGGGCTCGG
P7-82	CAAGCAGAAGACGGCATACGAGATaagtctaataGTCTCGTGGGCTCGG
P7-83	CAAGCAGAAGACGGCATACGAGATcggcttactaGTCTCGTGGGCTCGG
P7-84	CAAGCAGAAGACGGCATACGAGATgatatggtctGTCTCGTGGGCTCGG
P7-85	CAAGCAGAAGACGGCATACGAGATtagtcgtccaGTCTCGTGGGCTCGG
P7-86	CAAGCAGAAGACGGCATACGAGATtagctgctacGTCTCGTGGGCTCGG
P7-87	CAAGCAGAAGACGGCATACGAGATctcttcaagcGTCTCGTGGGCTCGG
P7-88	CAAGCAGAAGACGGCATACGAGATatgaacgcgcGTCTCGTGGGCTCGG
P7-89	CAAGCAGAAGACGGCATACGAGATgtcgacggaaGTCTCGTGGGCTCGG
P7-90	CAAGCAGAAGACGGCATACGAGATactaattgagGTCTCGTGGGCTCGG
P7-91	CAAGCAGAAGACGGCATACGAGATcttgcataatGTCTCGTGGGCTCGG
P7-92	CAAGCAGAAGACGGCATACGAGATtccttaccaaGTCTCGTGGGCTCGG
P7-93	CAAGCAGAAGACGGCATACGAGATtgcagcctacGTCTCGTGGGCTCGG
P7-94	CAAGCAGAAGACGGCATACGAGATggagctgaggGTCTCGTGGGCTCGG
P7-95	CAAGCAGAAGACGGCATACGAGATgcagcggactGTCTCGTGGGCTCGG
P7-96	CAAGCAGAAGACGGCATACGAGATcatcgcgctcGTCTCGTGGGCTCGG
